# Supplementary material for: Lobophytones O–T, New Biscembranoids and Cembranoid from Soft Coral Lobophytum pauciflorum
Source: PubMed Central journal article supplement (PMC2996179; doi:10.3390/md8112848), 2010-11-10
Supplement: marinedrugs-08-02837-s001.pdf [file marinedrugs-08-02837-s001.pdf]

# **Lobophytones O–T, New Biscembranoids and Cembranoid from Soft**

## ***Coral Lobophytum pauciflorum***

**Pengcheng Yan**<sup>1</sup>, **Zhiwei Deng**<sup>2</sup>, **Leen van Ofwegen**<sup>3</sup>, **Peter Proksch**<sup>4</sup>, **Wenhan Lin**<sup>1,\*</sup>

<sup>1</sup> State Key Laboratory of Natural and Biomimetic Drugs, Peking University, Beijing 100083, China; E-Mail: ypc@bjmu.edu.cn

<sup>2</sup> Analytical and testing Center, Beijing Normal University, Beijing, 100875, China; E-Mail: dengzw@bnu.edu.cn

<sup>3</sup> National Museum of Natural History Naturalis, 2300 RA Leiden, The Netherlands; E-Mail: ofwegen@naturalis.nnm.nl

<sup>4</sup> Institute of Pharmaceutical Biology and Biotechnology, Heinrich-Heine University, 40225 Duesseldorf, Germany; E-Mail: proksch@duesseldorf-uni.de

## **Supplemental Information**

## Spectra of compound 1

Avance DRX 500 Bruker A&T Center BNU  
Sample: ypc-H-46, Solvent: DMSO-d6  
1H NMR

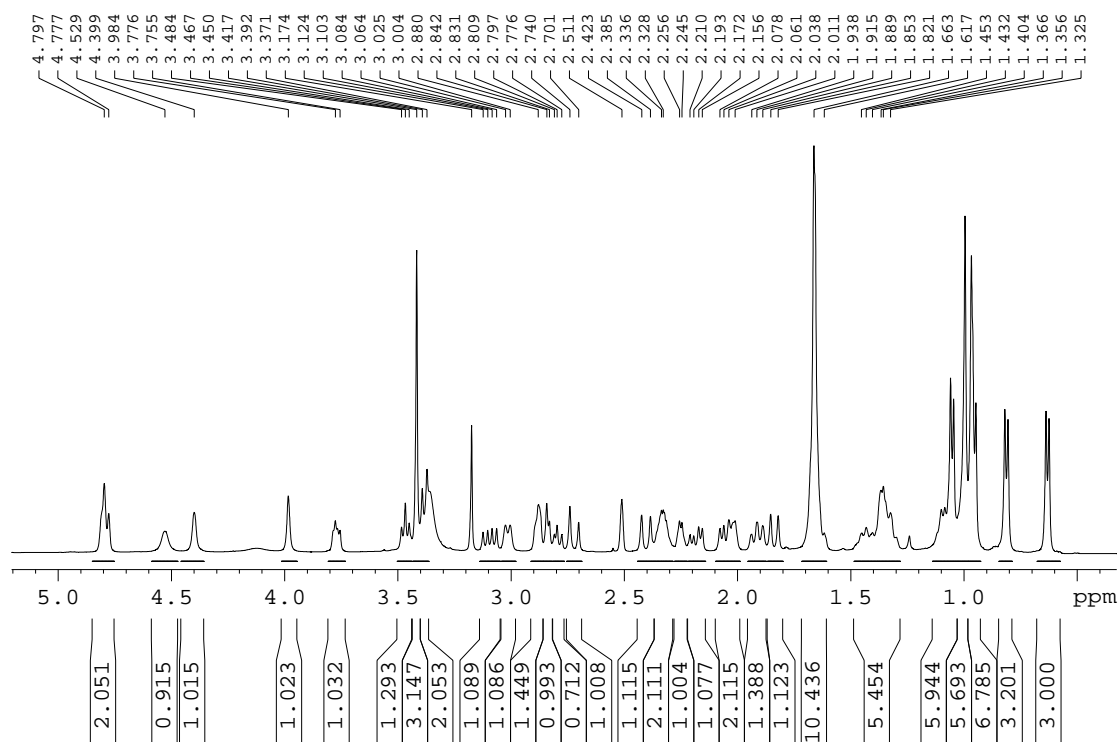

Figure S1 <sup>1</sup>H NMR spectrum of compound 1

ypc-H-46, DMSO-d6  
APT 13C NMR

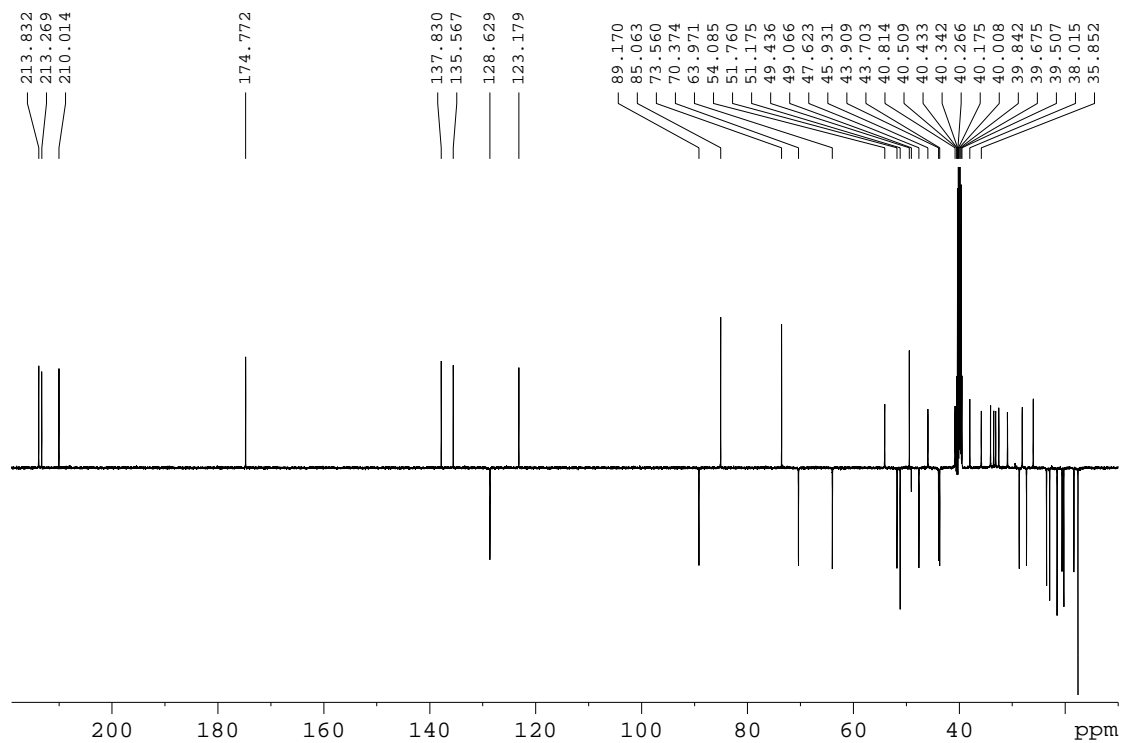

Figure S2 <sup>13</sup>C NMR spectrum of compound 1

Avance DRX 500 Bruker A&T Center BNU  
Sample: ypc-H-46, Solvent: DMSO-d6  
HMQC

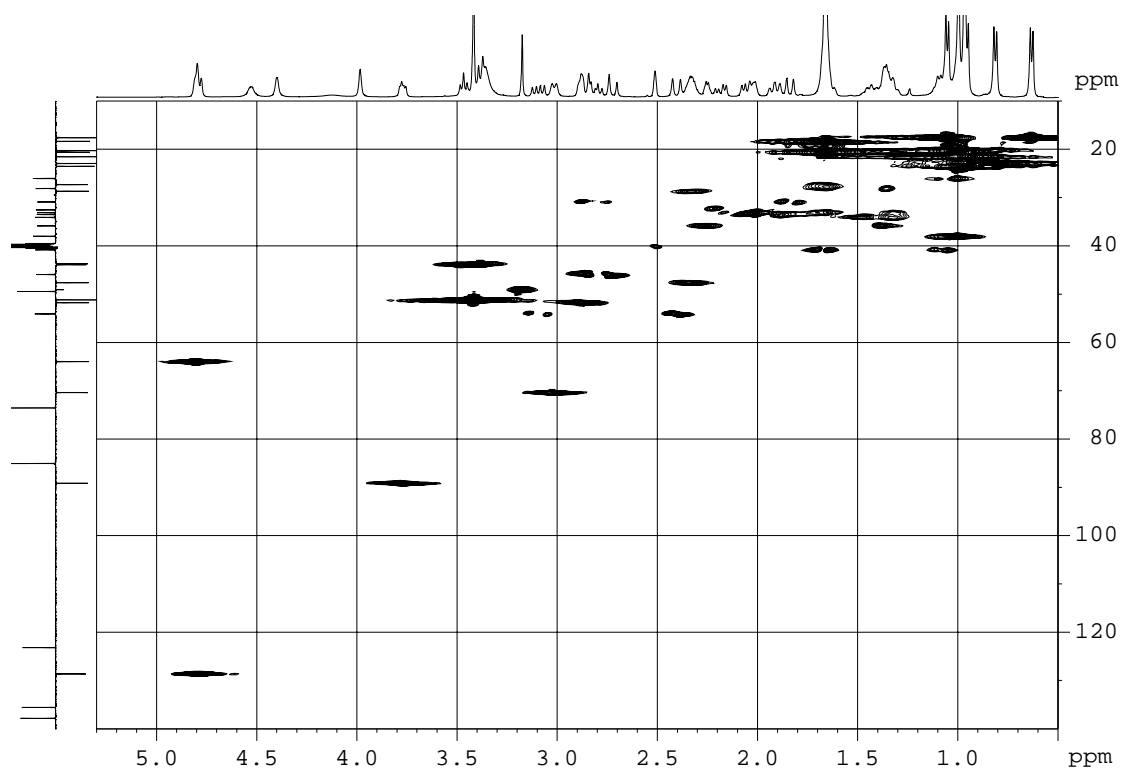

Figure S3 HMQC spectrum of compound 1

ypc-H-46, DMSO-d6  
HMBC

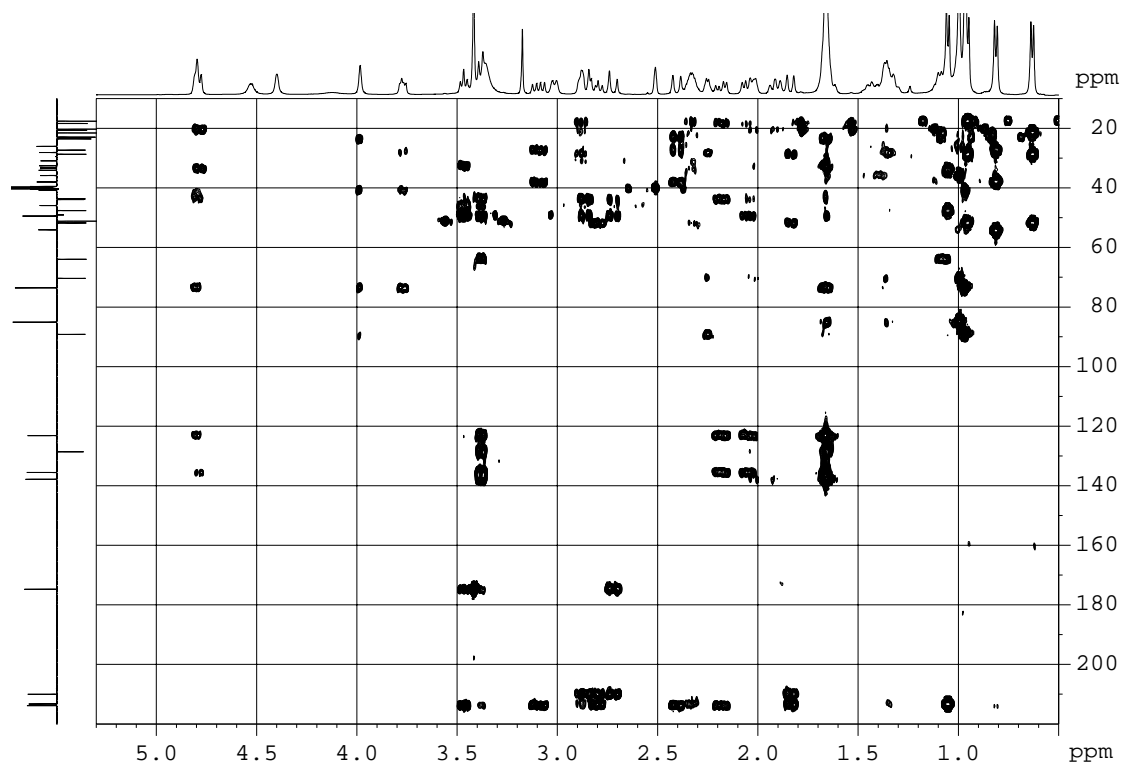

Figure S4 HMBC spectrum of compound 1

Avance DRX 500 Bruker A&T Center BNU  
Sample: ypc-H-46, Solvent: DMSO-d6  
COSY

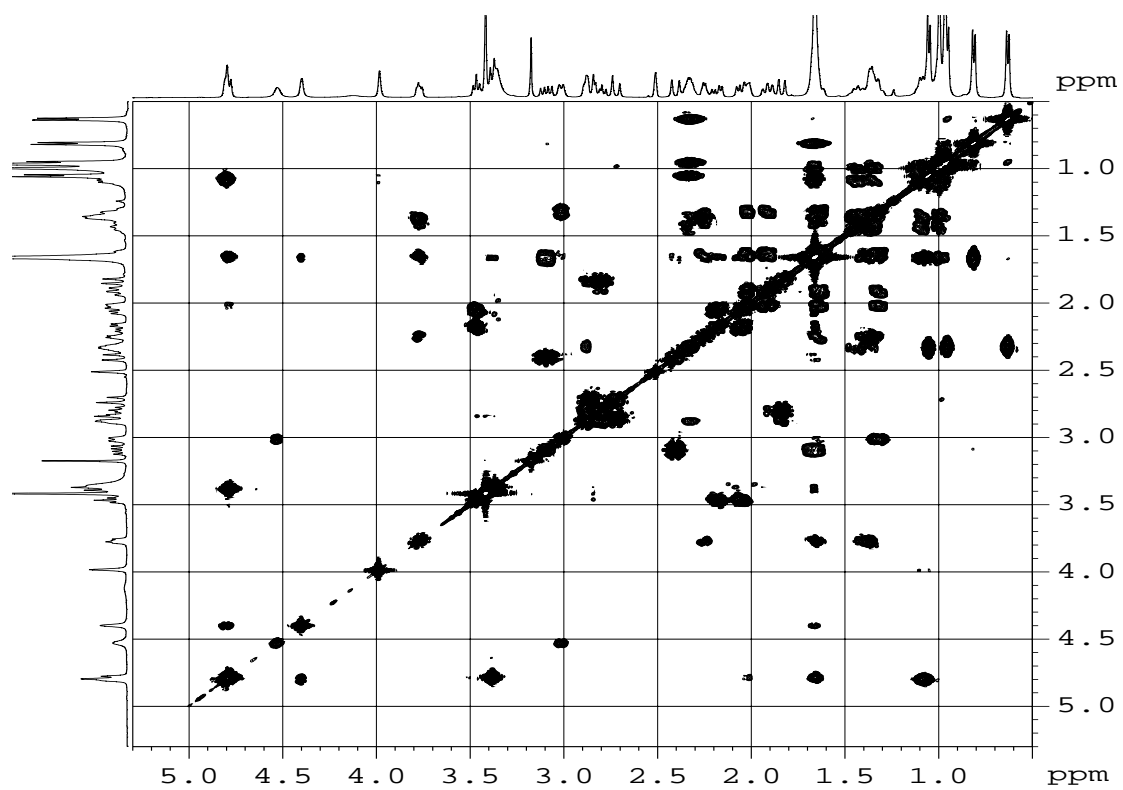

Figure S5 COSY spectrum of compound 1

ypc-H-46, DMSO-d6  
NOESY

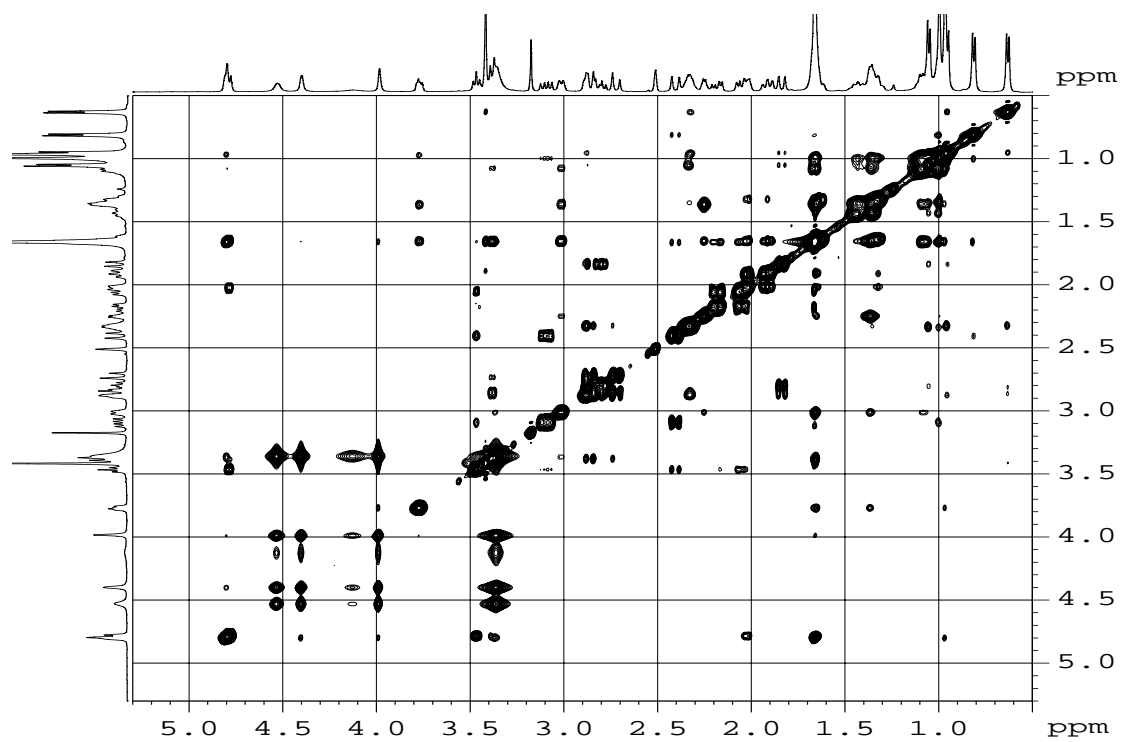

Figure S6 NOESY spectrum of compound 1

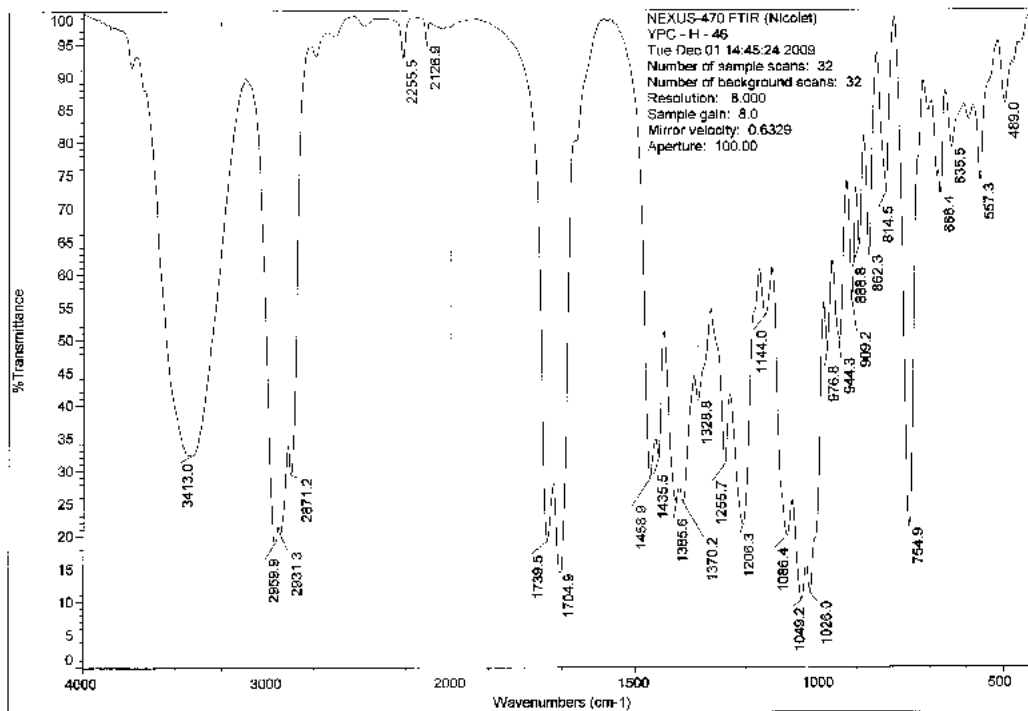

Figure S7 IR spectrum of compound 1

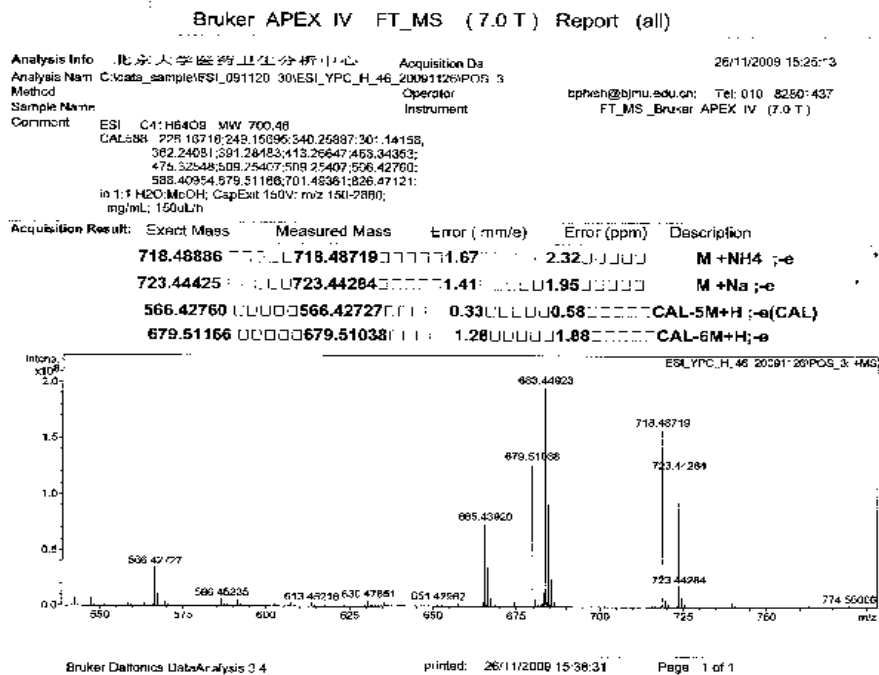

Figure S8 HRESIMS spectrum of compound 1

## Spectra of compound 2

Avance DRX 500 Bruker A&T Center BNU

Sample: ypc-H-20a, Solvent: DMSO-d6

<sup>1</sup>H NMR

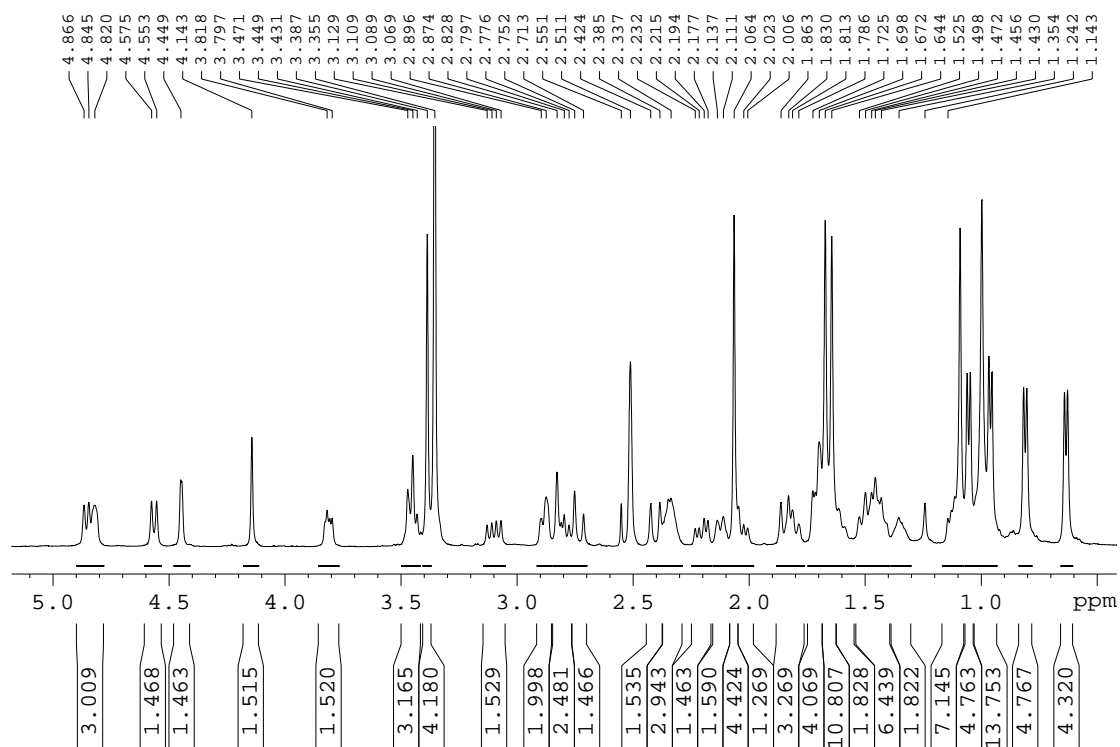

Figure S9 <sup>1</sup>H NMR spectrum of compound 2

ypc-H-20a, DMSO-d6

APT <sup>13</sup>C NMR

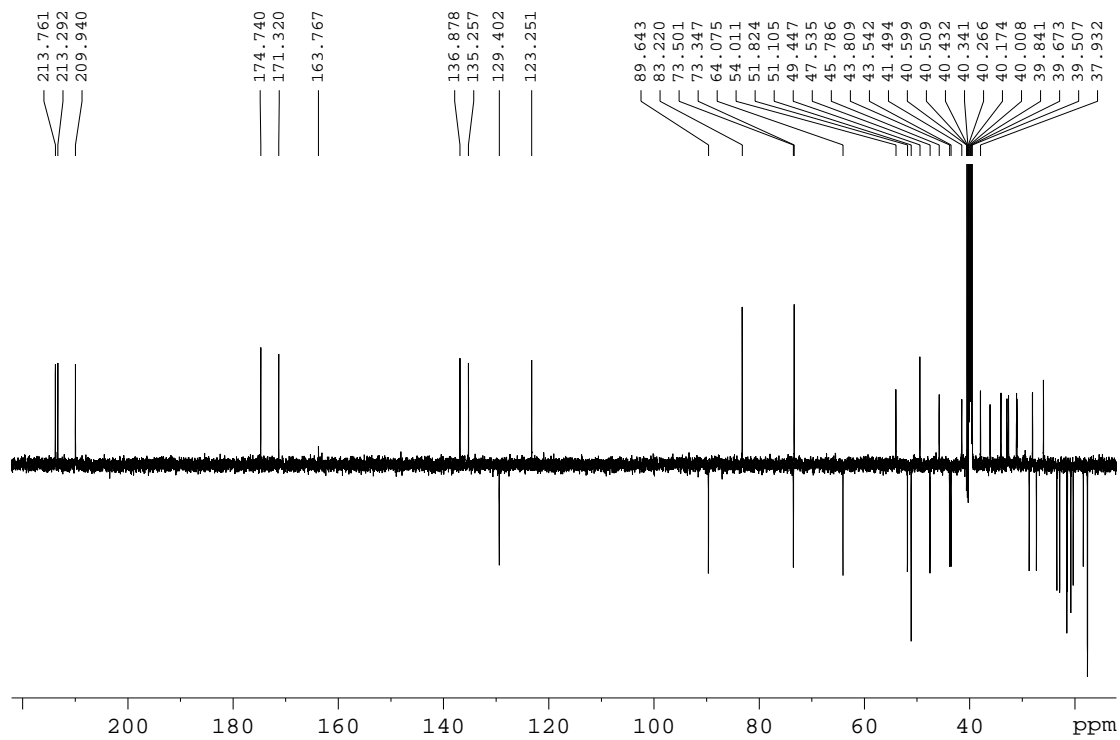

Figure S10 <sup>13</sup>C NMR spectrum of compound 2

ypc-H-20a, DMSO-d6  
HMQC

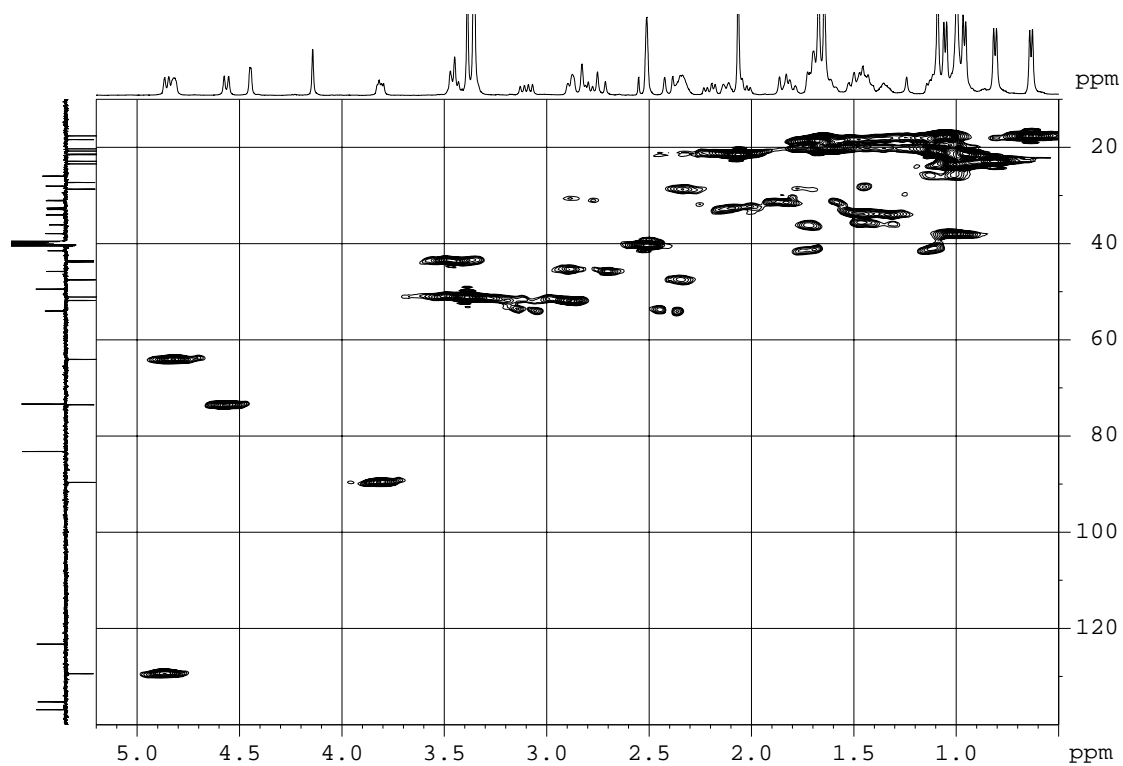

Figure S11 HMQC spectrum of compound 2

ypc-H-20a, DMSO-d6  
HMBC

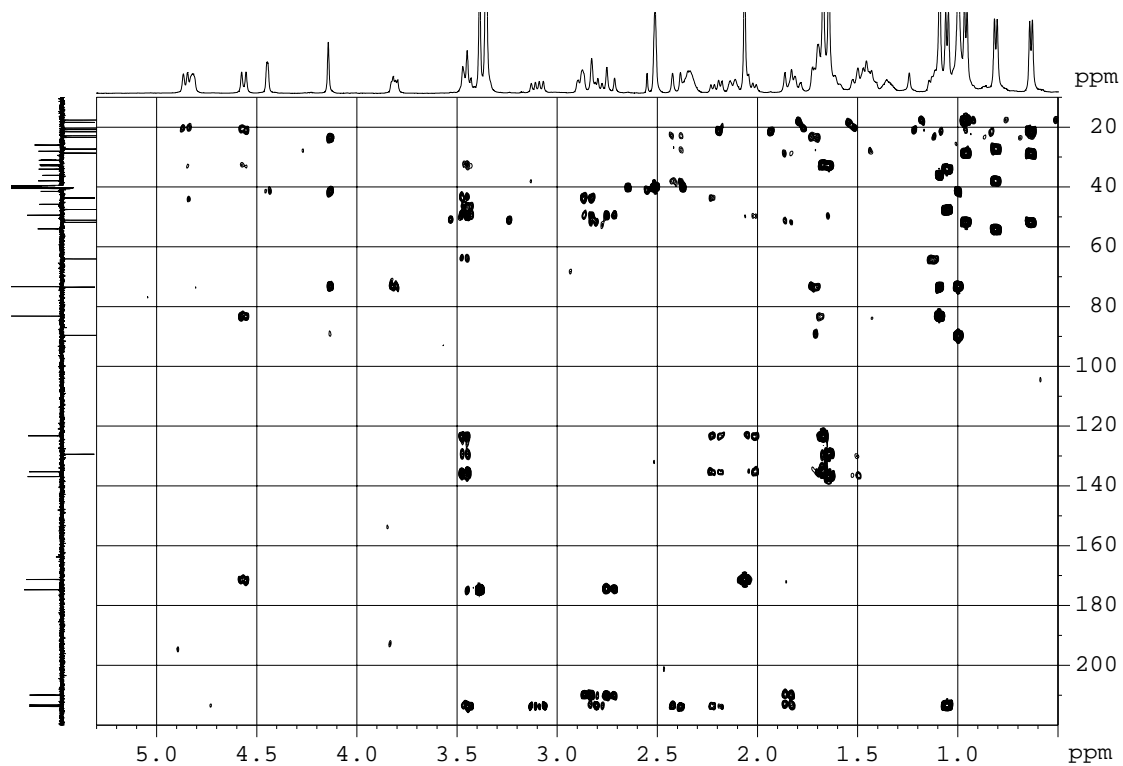

Figure S12 HMBC spectrum of compound 2

Sample: ypc-H-20a, Solvent: DMSO-d6  
COSY

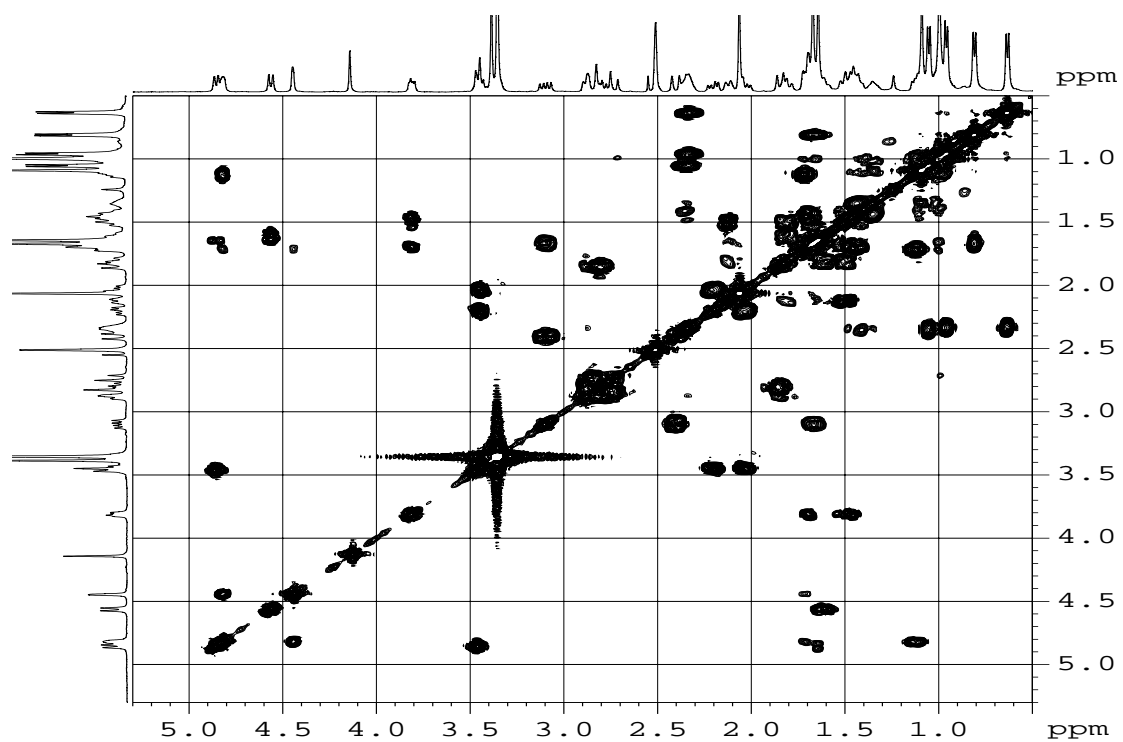

Figure S13 COSY spectrum of compound 2

ypc-H-20a, DMSO-d6  
NOESY

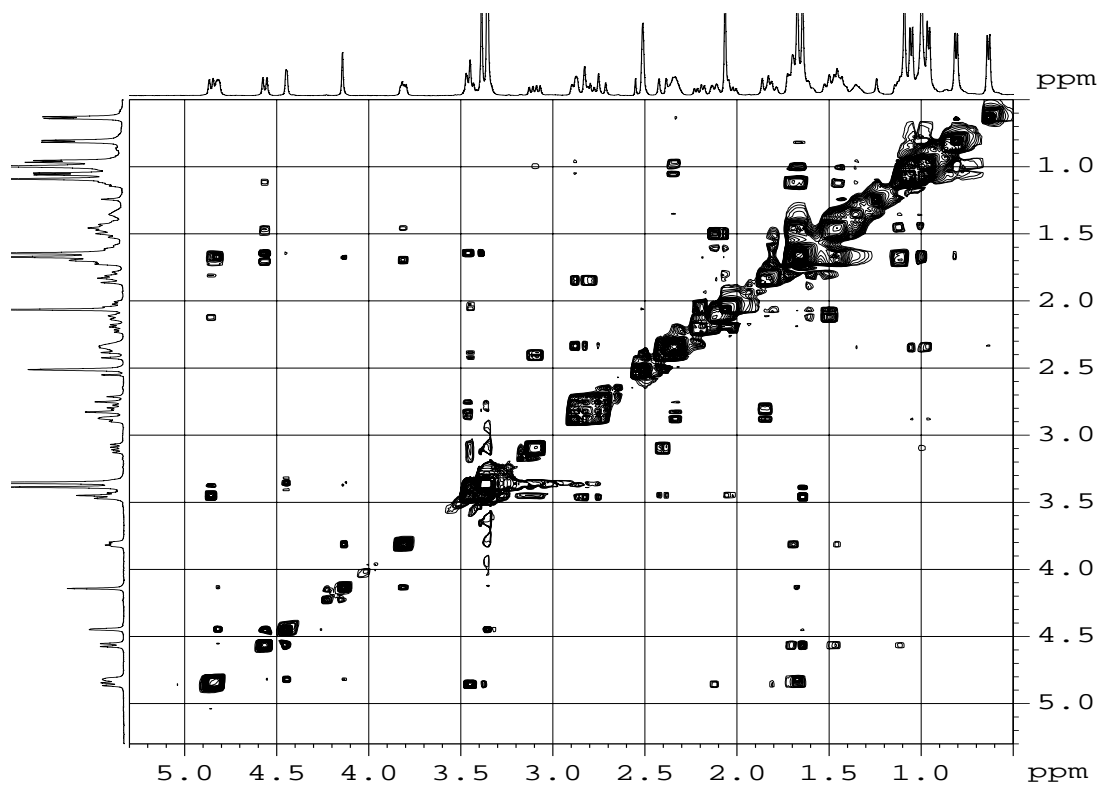

Figure S14 NOESY spectrum of compound 2



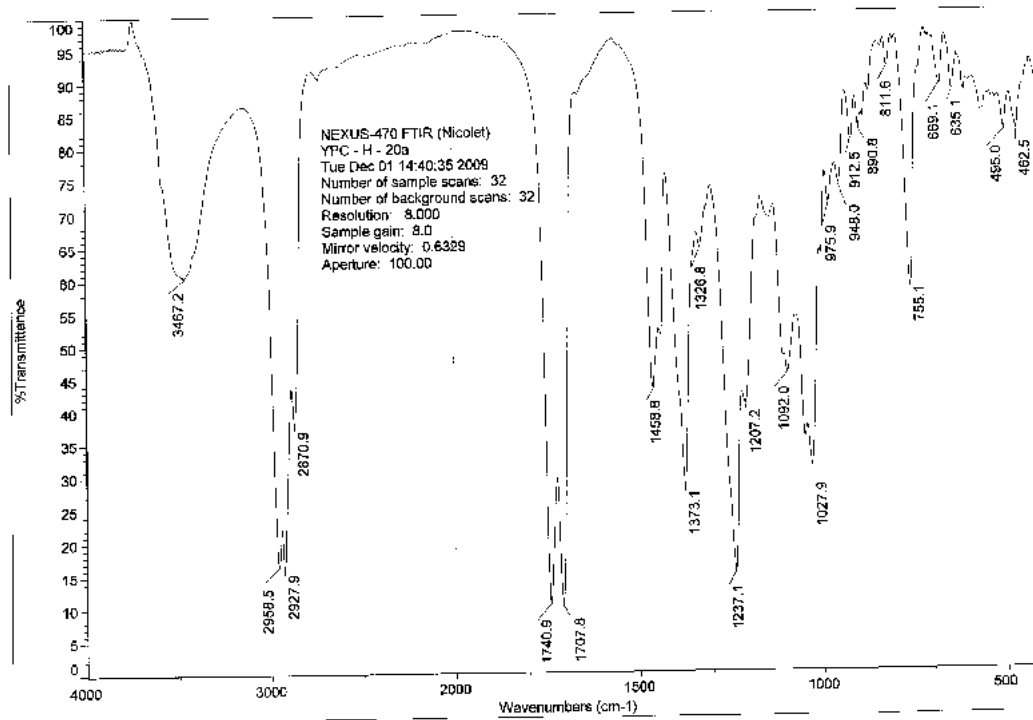

Figure S15 IR spectrum of compound 2

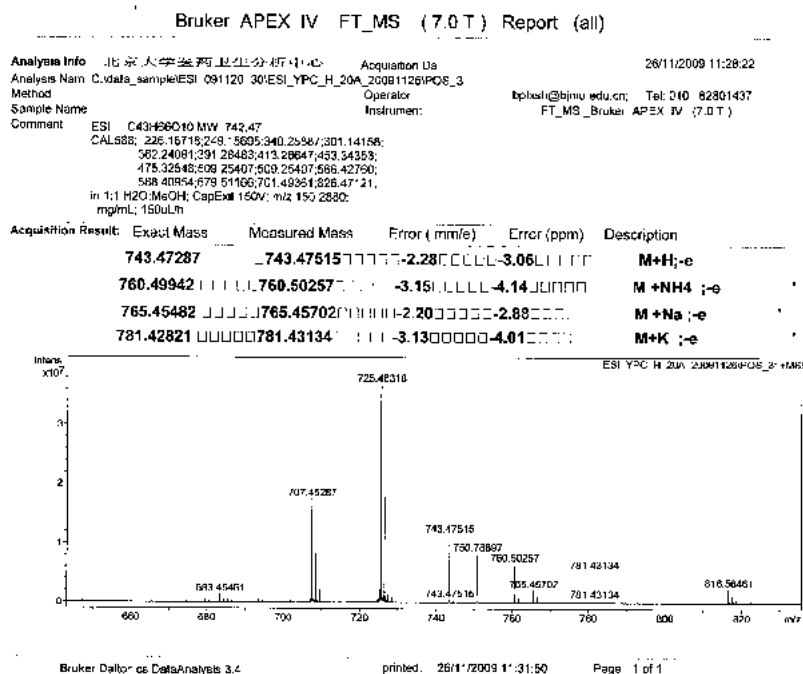

Figure S16 HRESIMS spectrum of compound 2

### Spectra of compound 3

Avance DRX 500 Bruker A&T Center BNU  
Sample: ypc-H-24, Solvent: DMSO-d6  
1H NMR

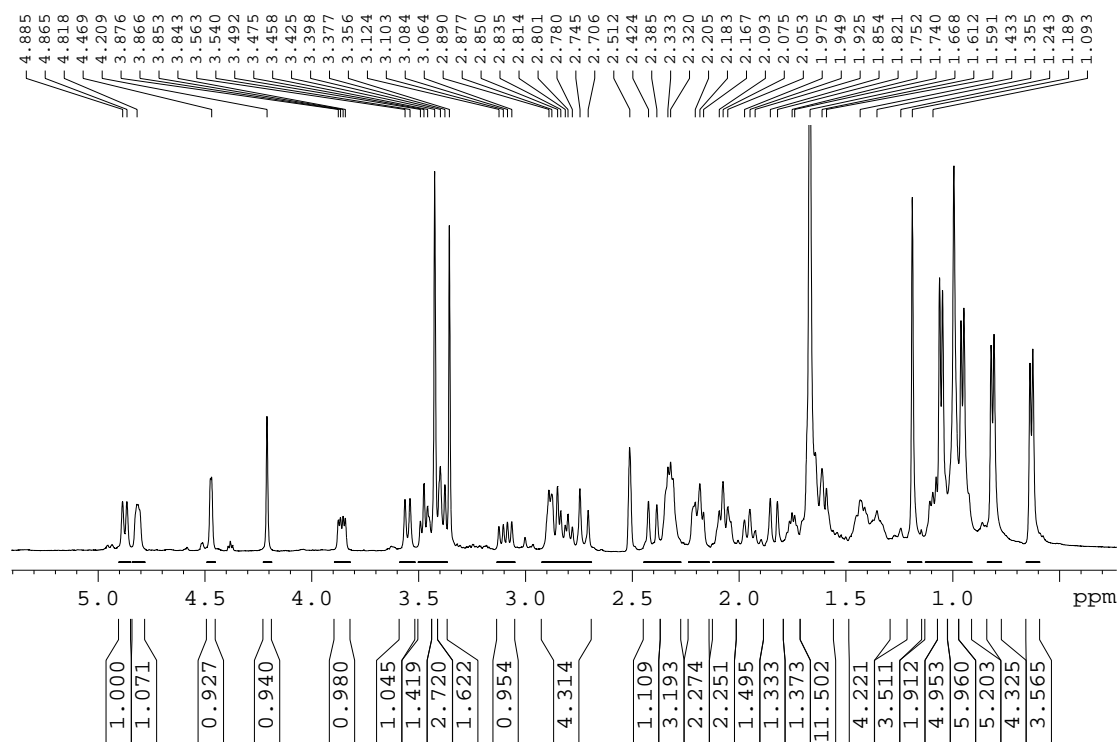

Figure S17 <sup>1</sup>H NMR spectrum of compound 3

Avance DRX 500 Bruker A&T Center BNU  
Sample: ypc-H-24, Solvent: DMSO-d6  
APT 13C NMR

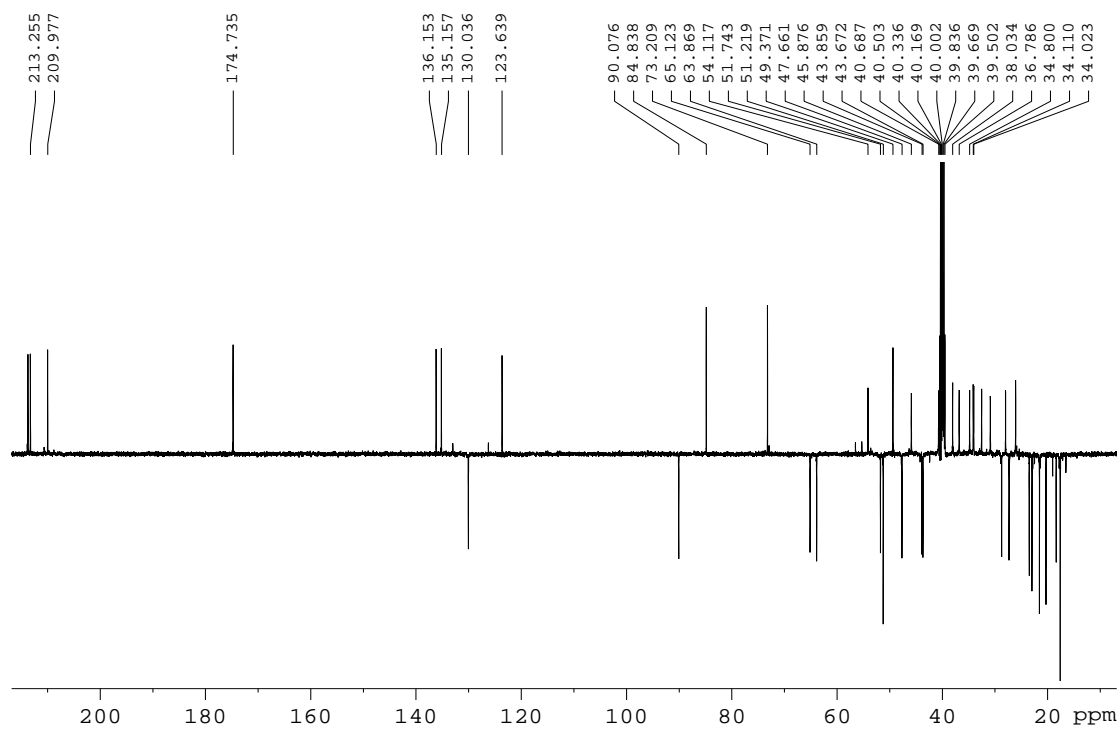

Figure S18 <sup>13</sup>C NMR spectrum of compound 3

Avance DRX 500 Bruker A&T Center BNU  
Sample: ypc-H-24, Solvent: DMSO-d6  
HMQC

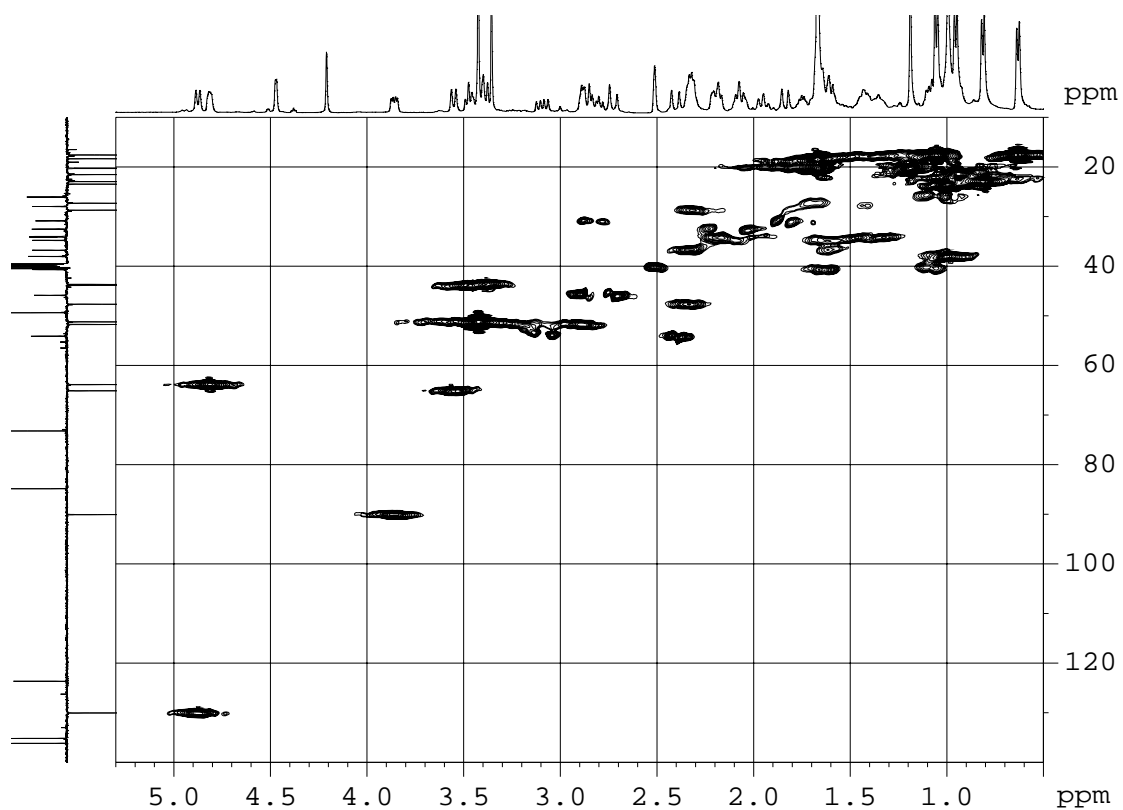

Figure S19 HMQC spectrum of compound 3

Avance DRX 500 Bruker A&T Center BNU  
Sample: ypc-H-24, Solvent: DMSO-d6  
HMBC

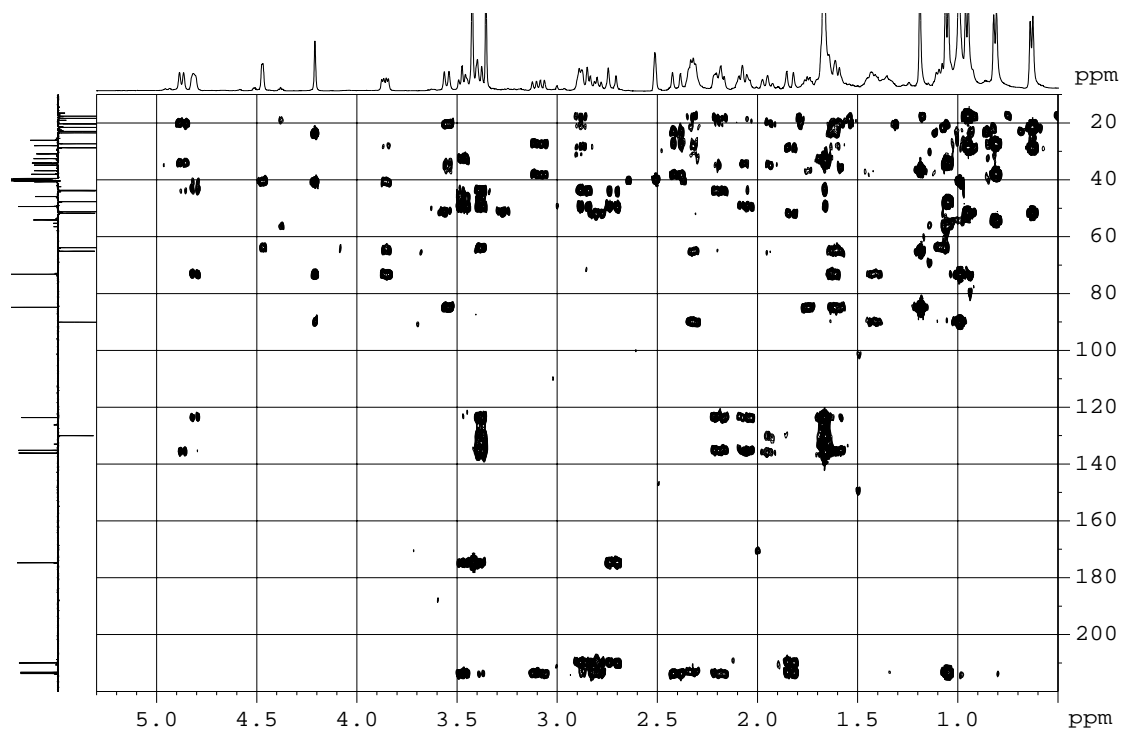

Figure S20 HMBC spectrum of compound 3

Avance DRX 500 Bruker A&T Center BNU  
Sample:ypc-H-24, Solvent:DMSO-d6  
COSY

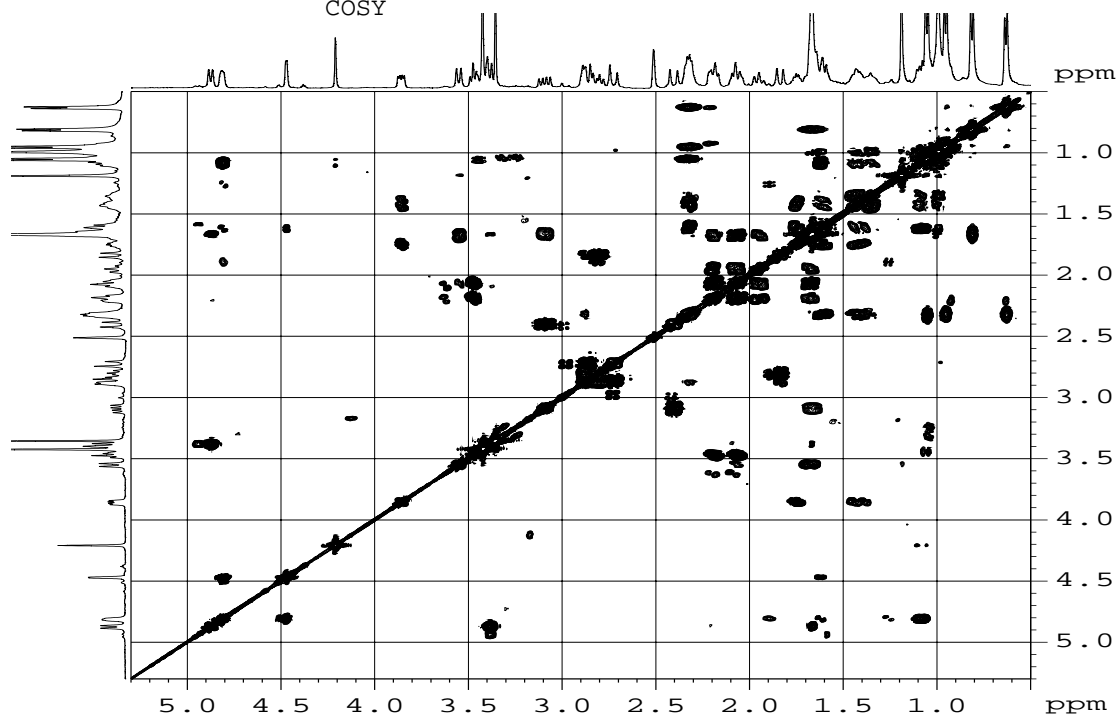

Figure S21 COSY spectrum of compound 3

Avance DRX 500 Bruker A&T Center BNU  
Sample:ypc-H-24, Solvent: DMSO-d6  
NOESY

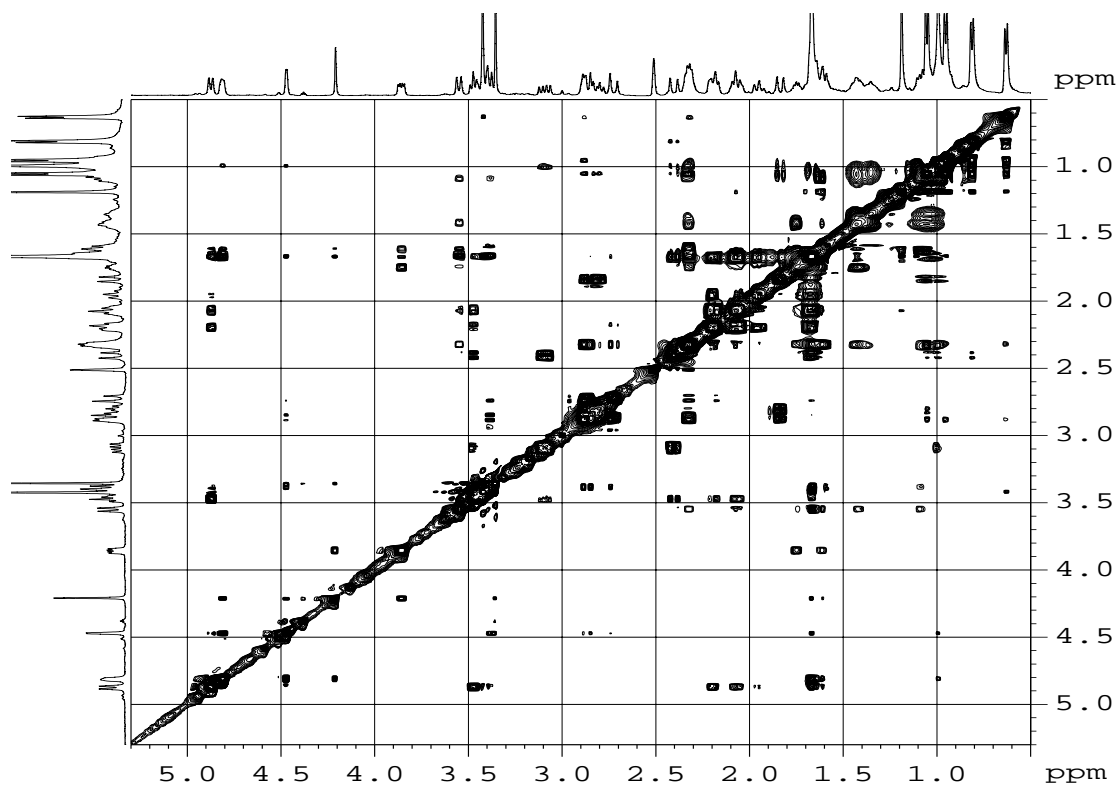

Figure S22 NOESY spectrum of compound 3

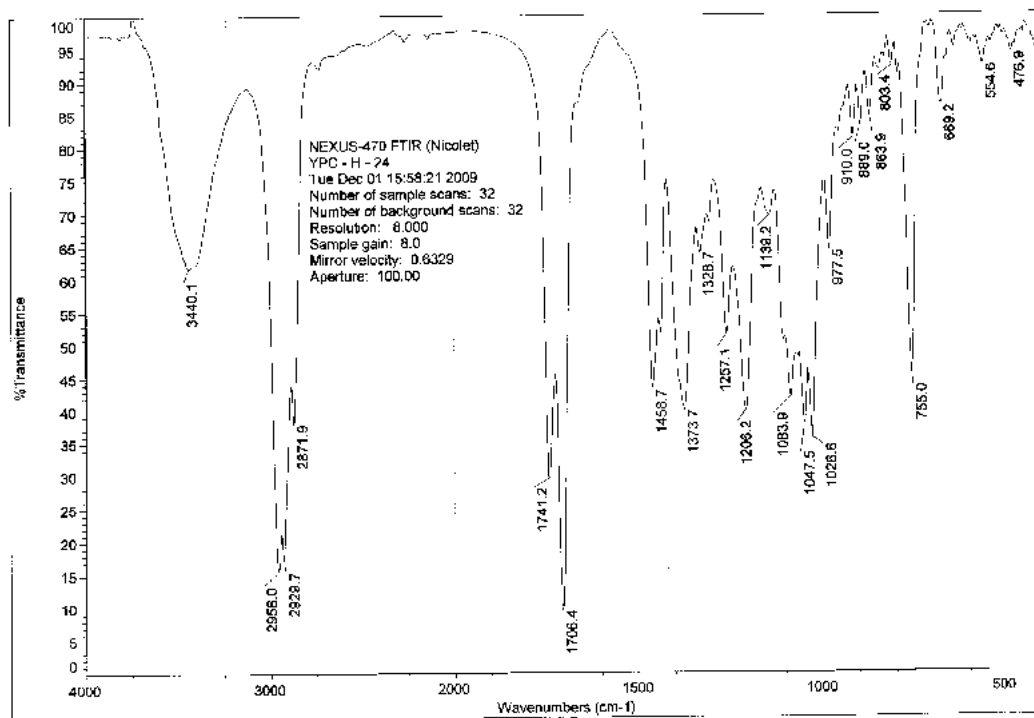

Figure S23 IR spectrum of compound 3

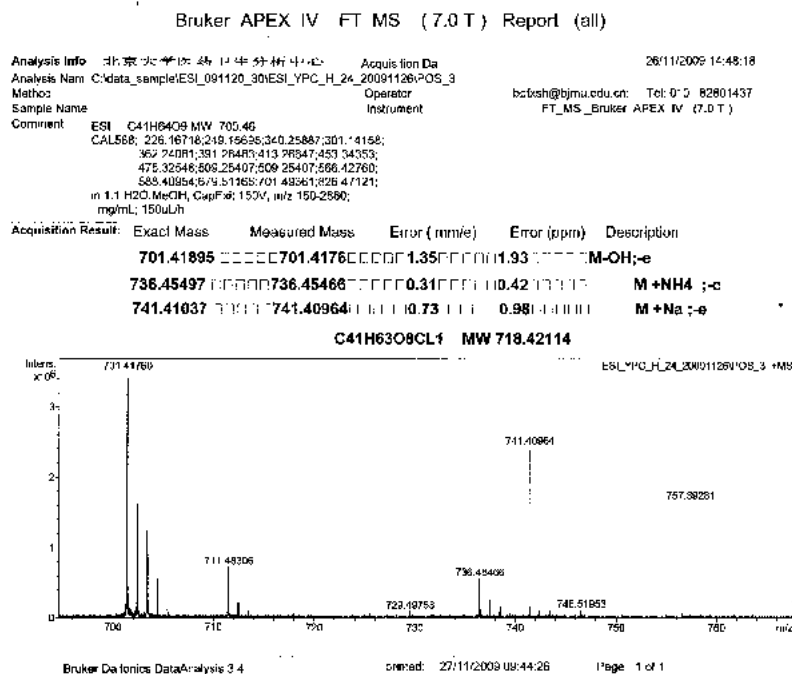

Figure S24 HRESIMS spectrum of compound 3

# Spectra of compound 4

ypc-H-13, DMSO-d6  
1H NMR

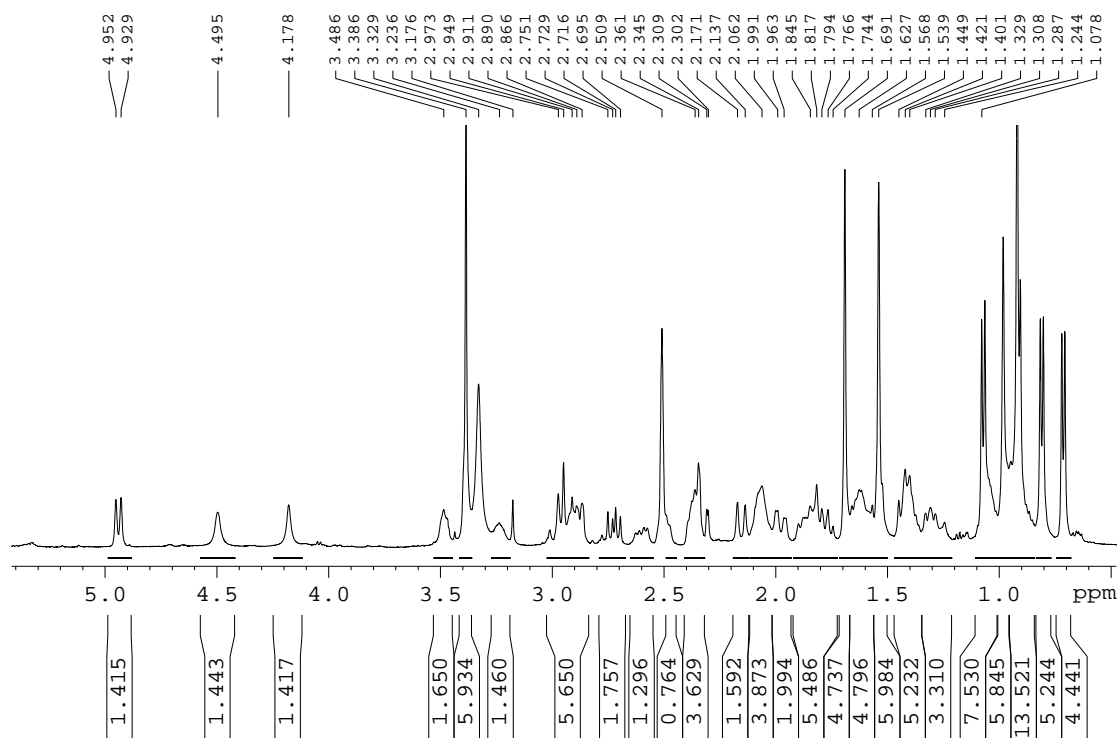

Figure S25 <sup>1</sup>H NMR spectrum of compound 4

ypc-H-13, DMSO-d6  
APT 13C NMR

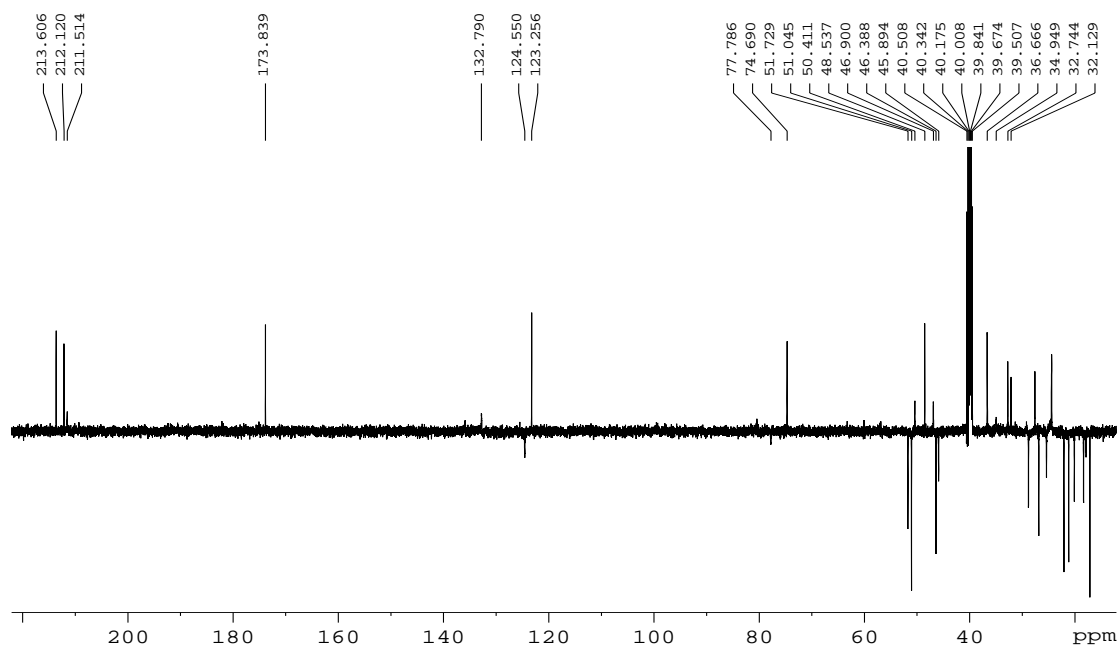

Figure S26 <sup>13</sup>C NMR spectrum of compound 4

ypc-H-13, DMSO-d6  
HMQC

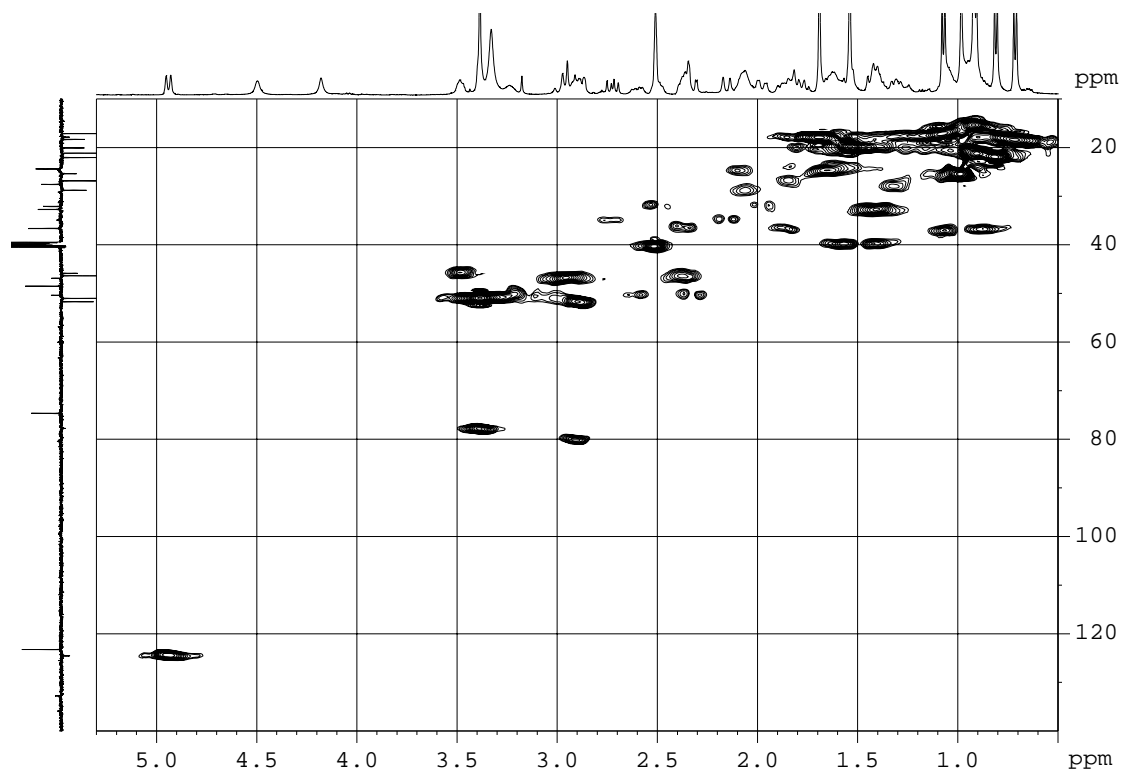

Figure S27 HMQC spectrum of compound 4

Avance DRX 500 Bruker, A&T Center BNU  
Sample: ypc-H-13, Solvent: DMSO-d6  
HMBC

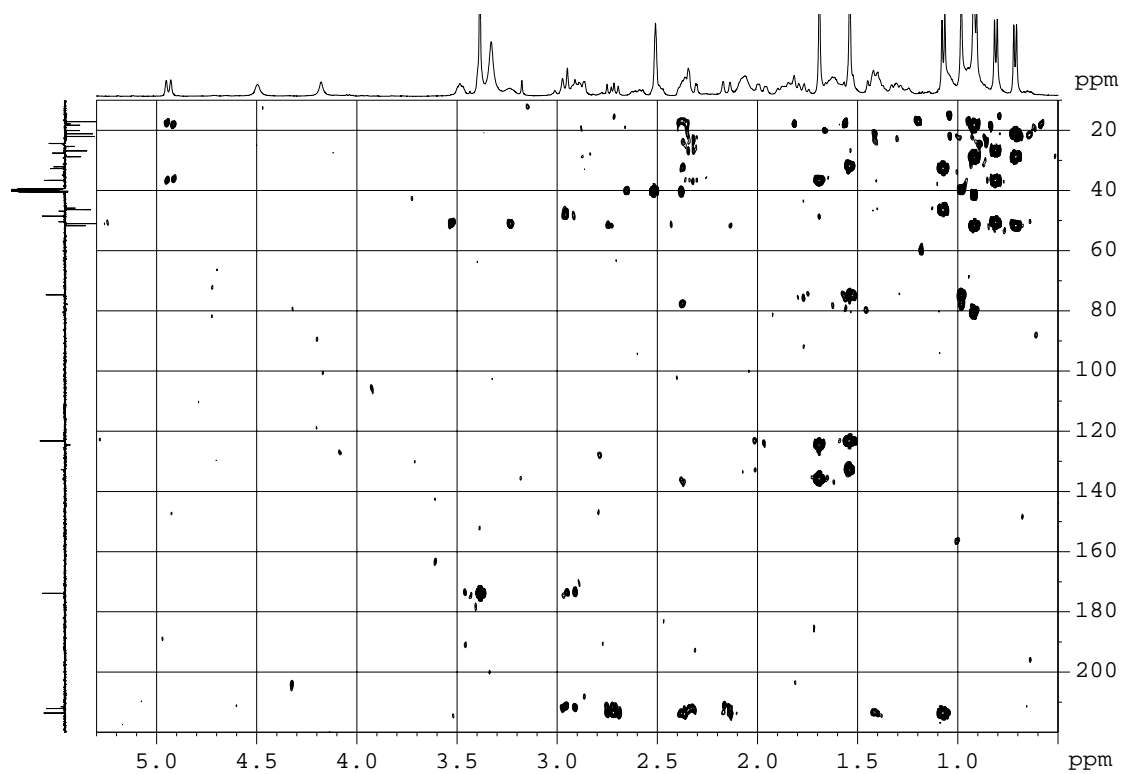

Figure S28 HMBC spectrum of compound 4

ypc-H-13, DMSO-d6  
COSY

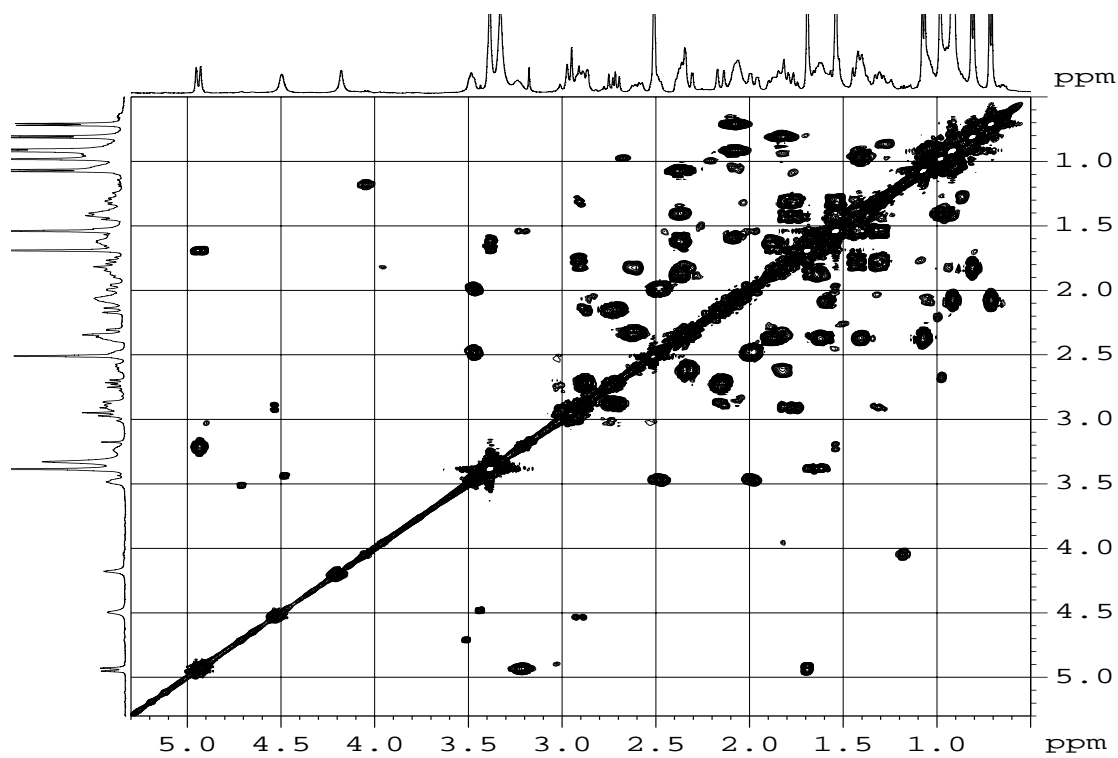

Figure S29 COSY spectrum of compound 4

Avance DRX 500 Bruker, A&T Center BNU  
Sample: ypc-H-13, Solvent: DMSO  
NOESY

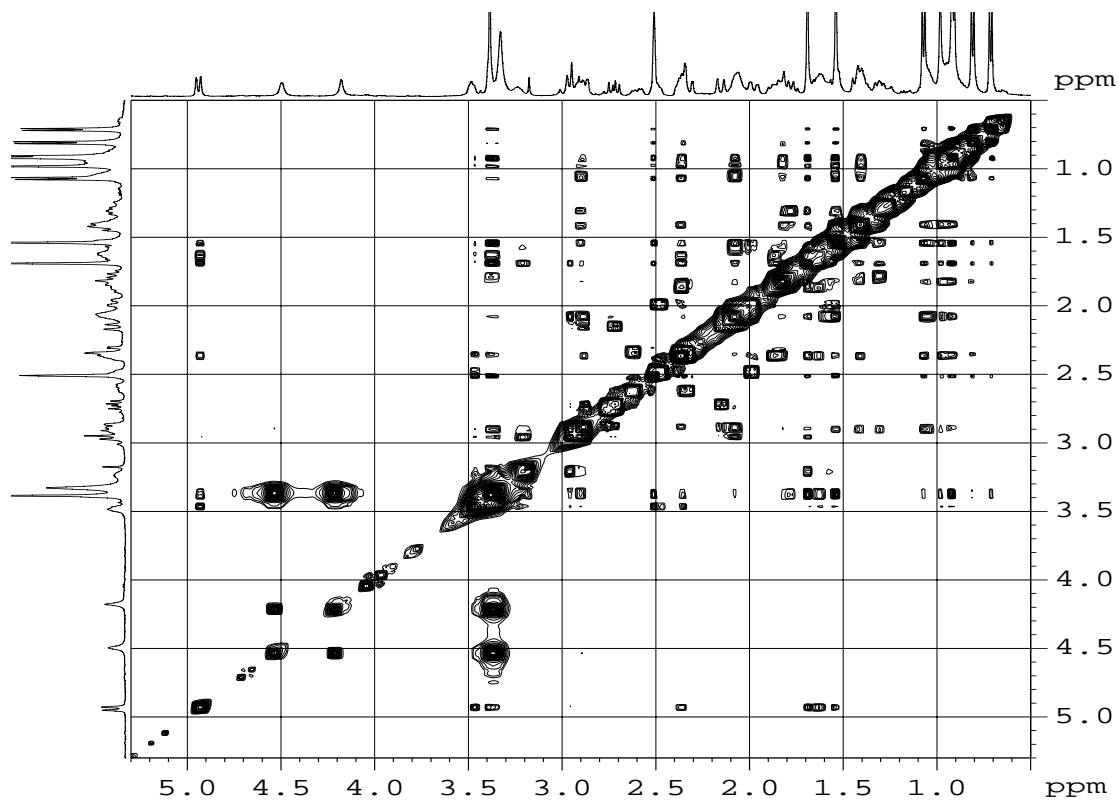

Figure S30 NOESY spectrum of compound 4



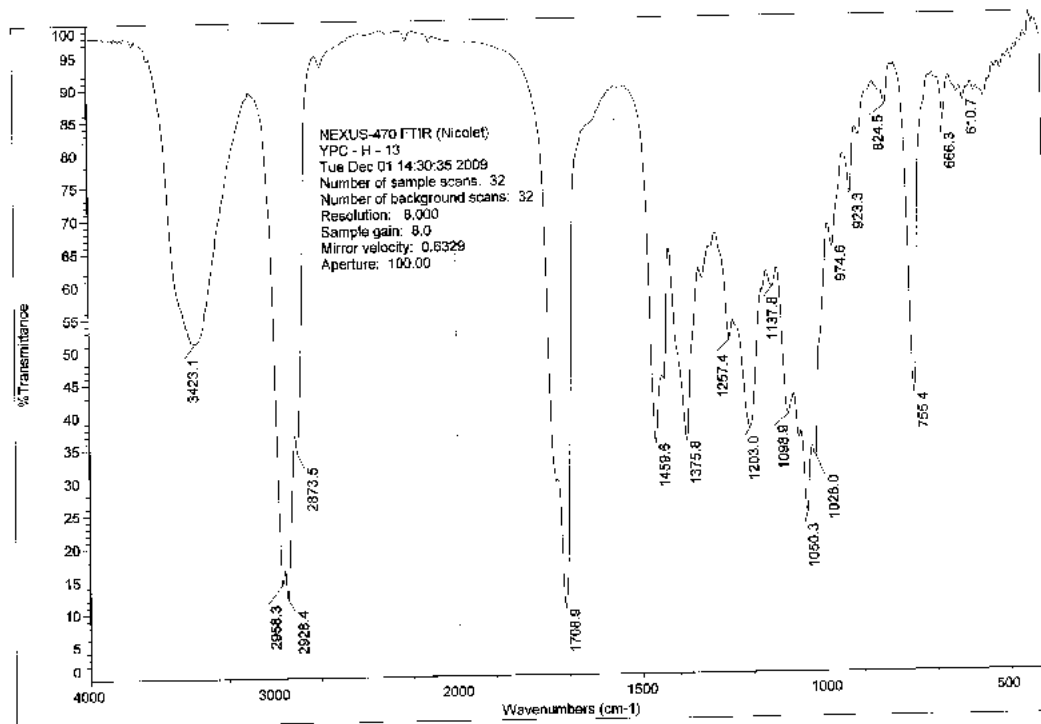

Figure S31 IR spectrum of compound 4

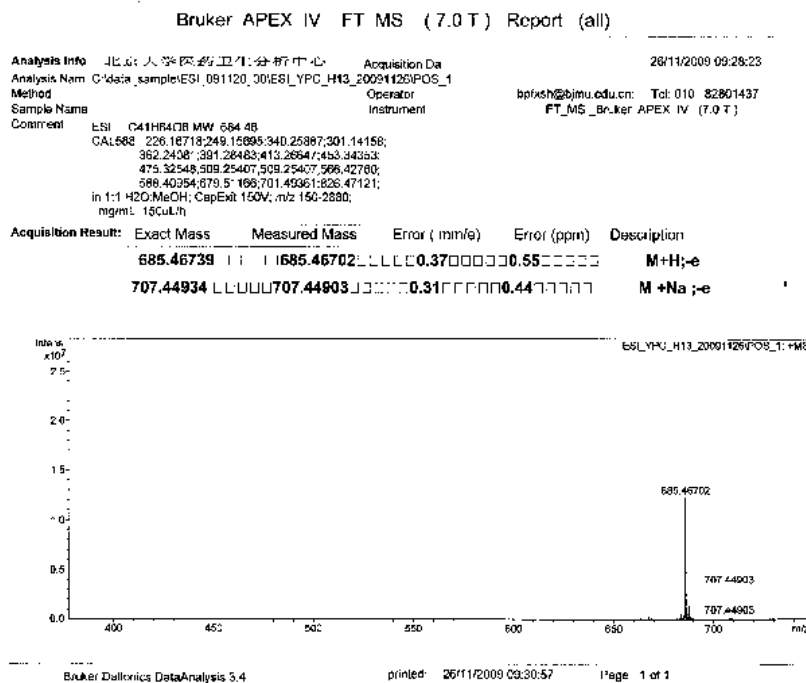

Figure S32 HRESIMS spectrum of compound 4

## Spectra of compound 5

advance 500 Bruker, A&T Center BNU  
sample:ypc-H-27a; Solvent:DMSO-d6  
1H NMR

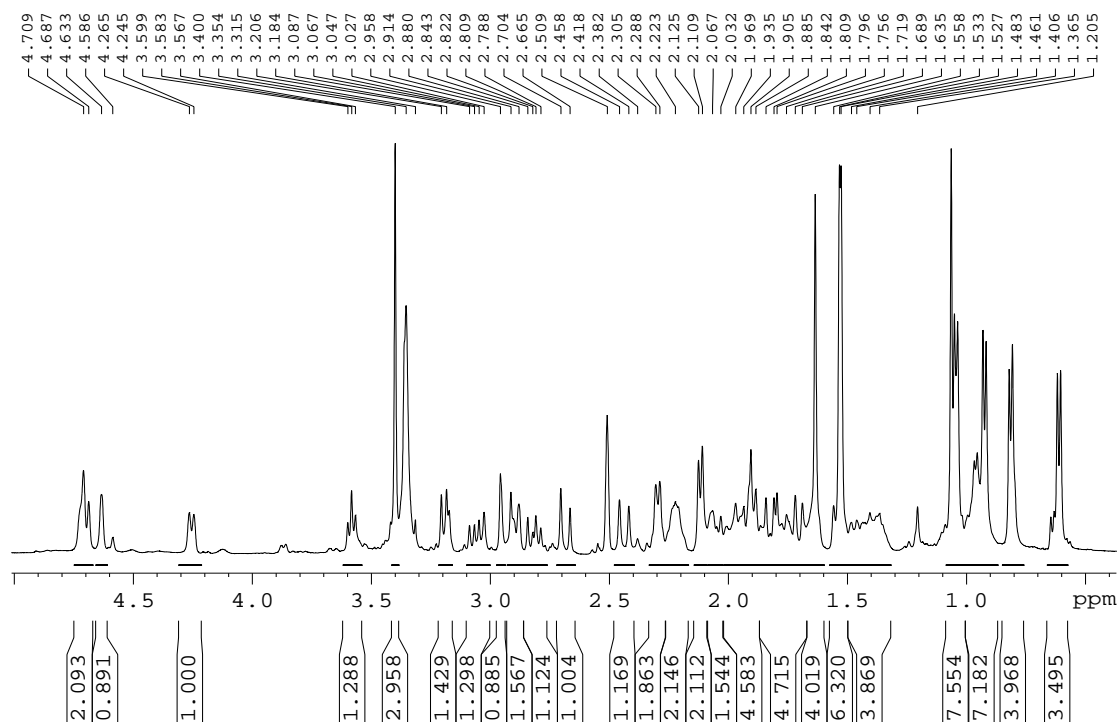

Figure S33  $^1\text{H}$  NMR spectrum of compound 5

Avance DRX 500 Bruker A&T Center BNU  
Sample:ypc-H-27a, Solvent:DMSO-d6  
APT 13C NMR

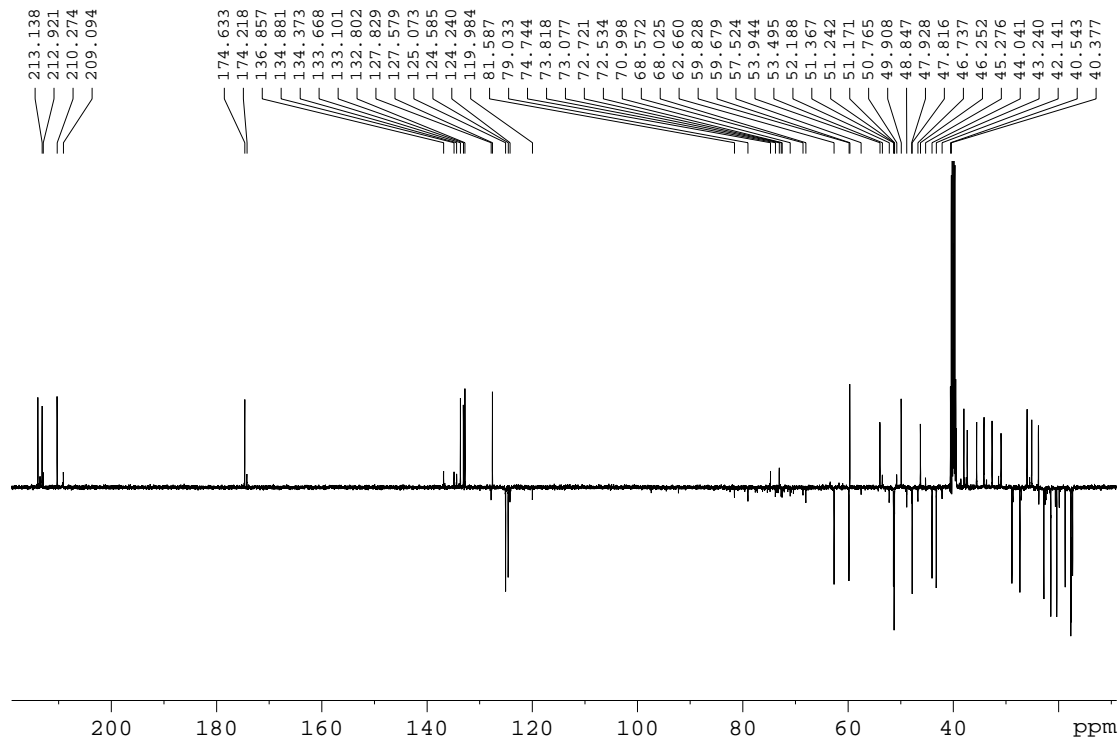

Figure S34  $^{13}\text{C}$  NMR spectrum of compound 5

Avance DRX 500 Bruker A&T Center BNU  
Sample: ypc-H-27a, DMSO-d6.  
HMQC

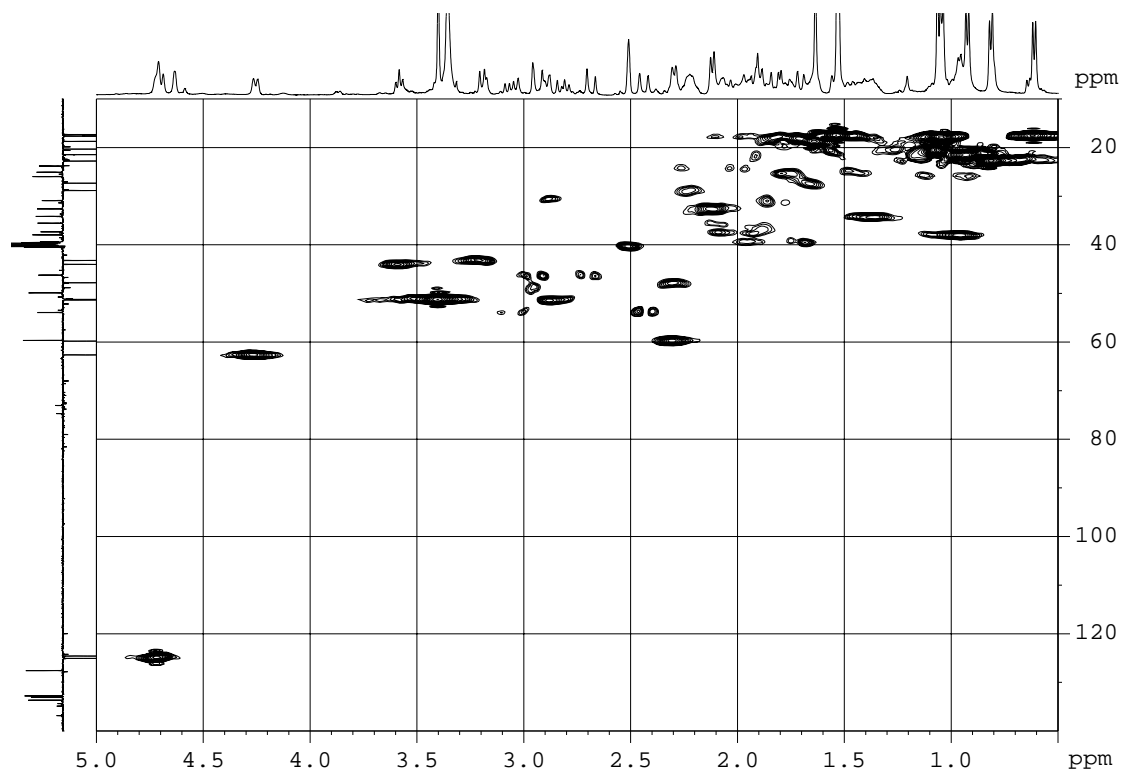

Figure S35 HMQC spectrum of compound 5

ypc-H-27a, DMSO-d6  
HMBC

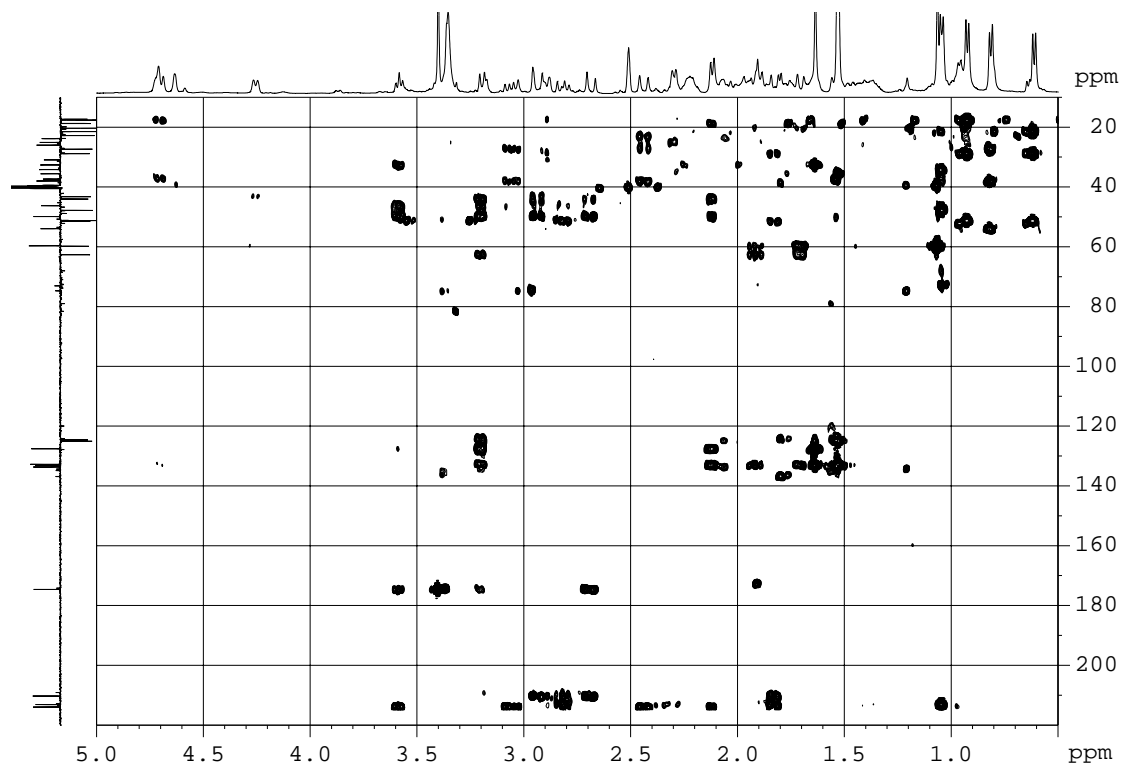

Figure S36 HMBC spectrum of compound 5

Avance DRX 500 Bruker A&T Center BNU  
Sample: ypc-H-27a, Solvent: DMSO-d6  
COSY

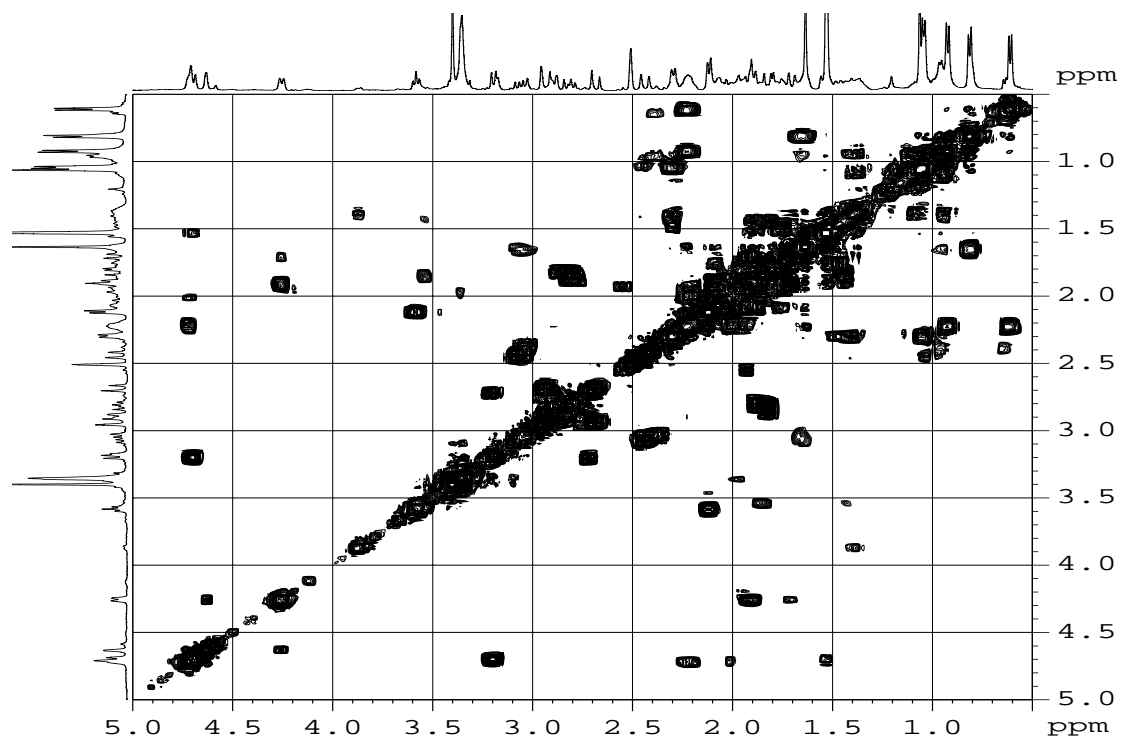

Figure S37 COSY spectrum of compound 5

ypc-H-27a, DMSO-d6  
NOESY

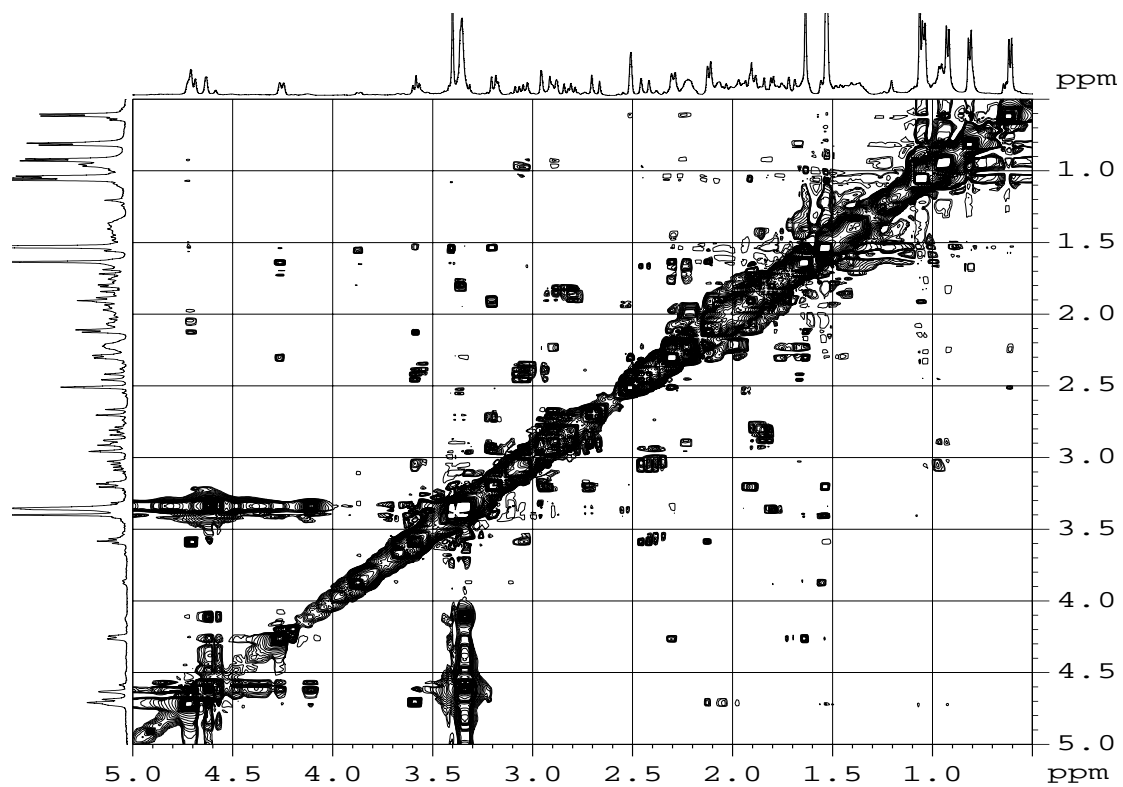

Figure S38 NOESY spectrum of compound 5

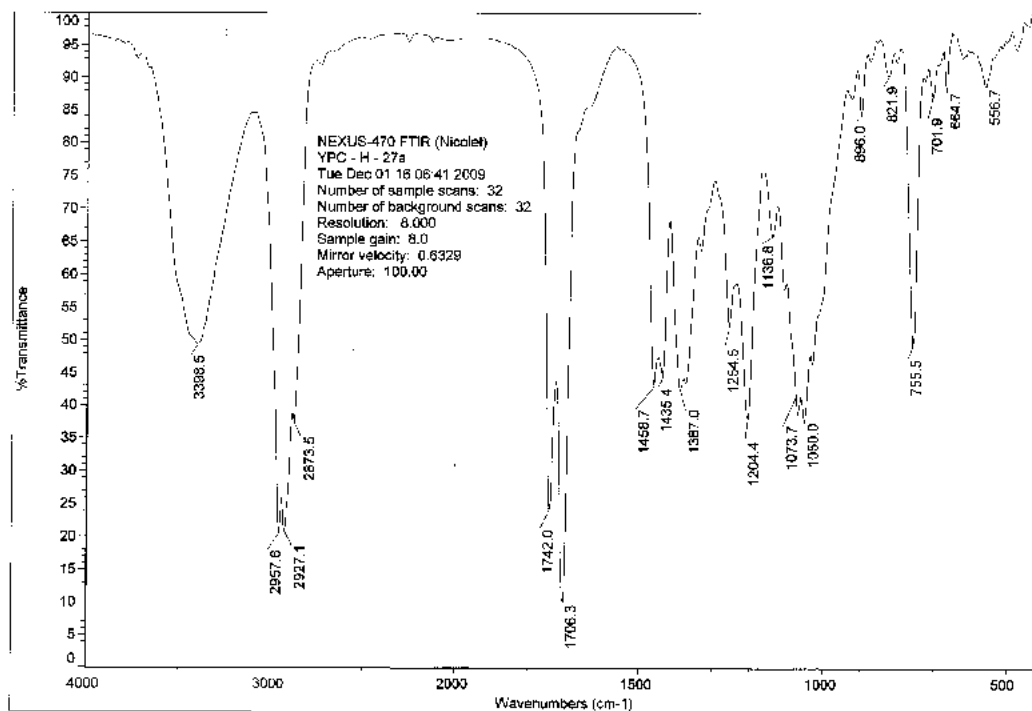

Figure S39 IR spectrum of compound 5

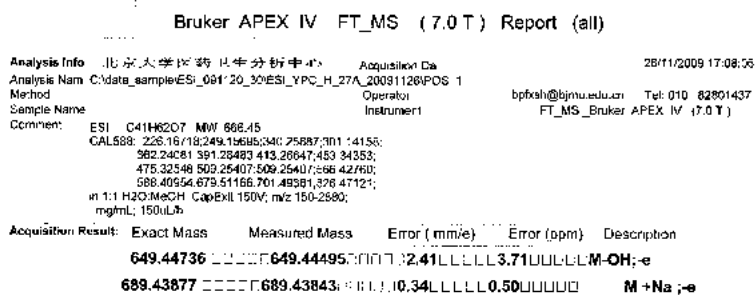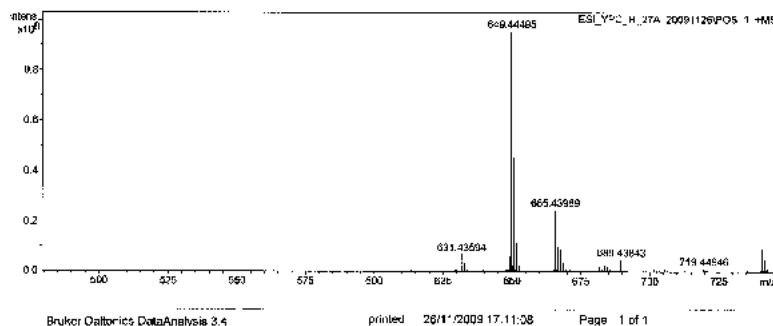

Figure S40 HRESIMS spectrum of compound 5

## Spectra of compound 6

CNU VNMRs 600MHz  
ypc-H-59, DMSO-d6  
1H NMR

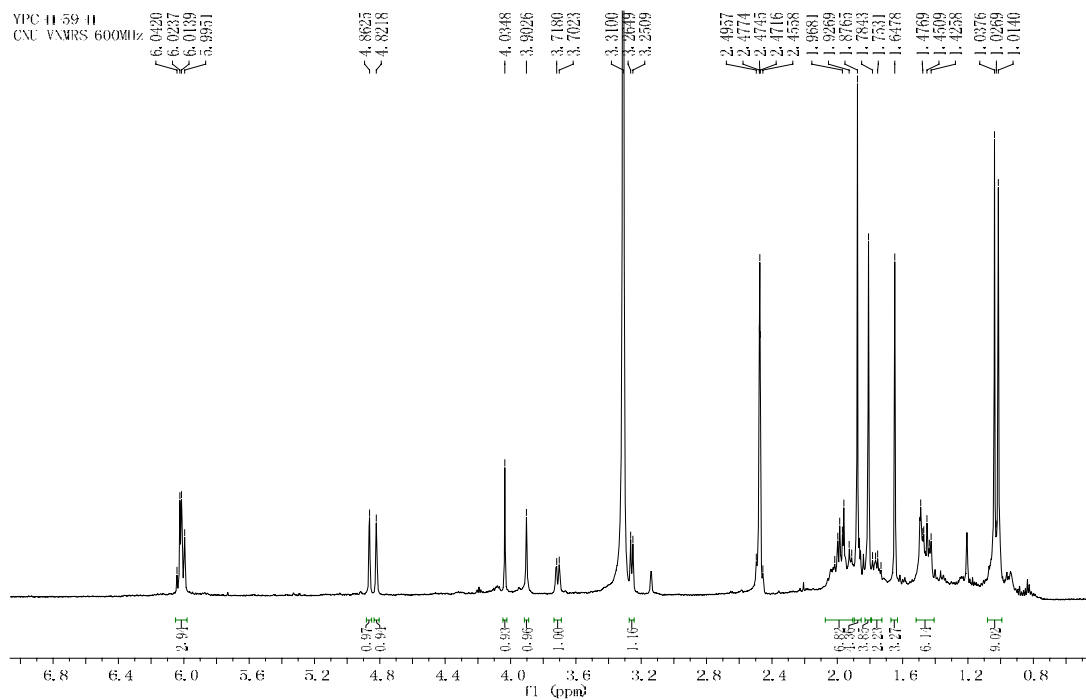

Figure S41 <sup>1</sup>H NMR spectrum of compound 6

CNU VNMRs 600MHz  
ypc-H-59, DMSO-d6  
APT 13C NMR

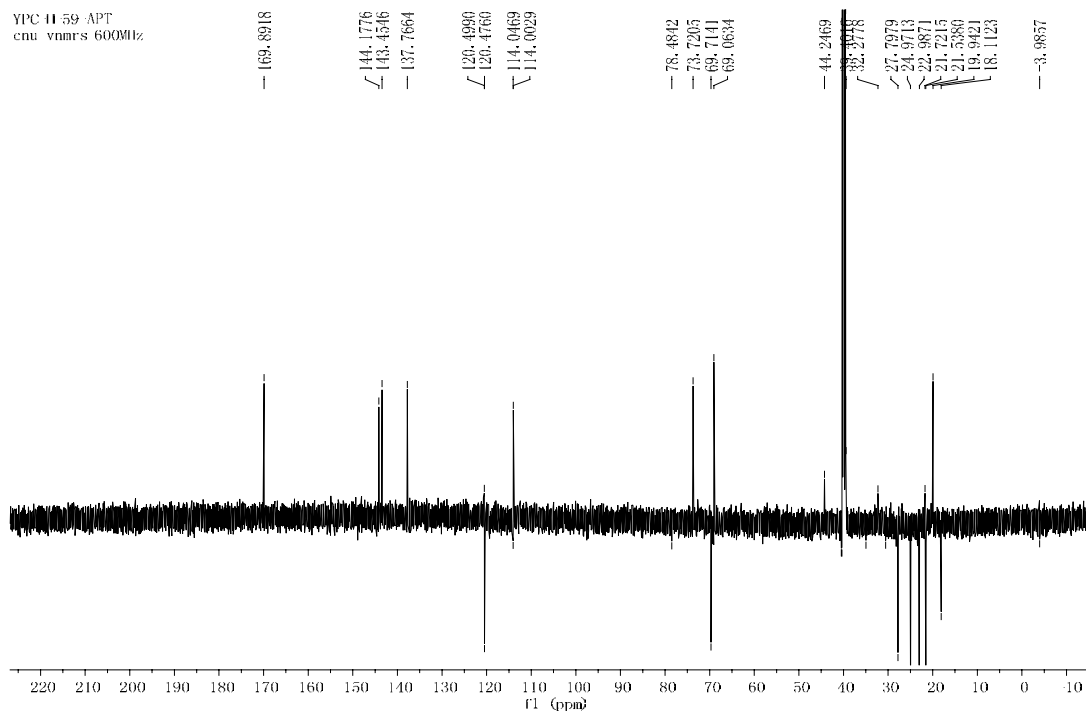

Figure S42 <sup>13</sup>C NMR spectrum of compound 6

CNU VNMR5 600MHz  
ypc-H-59, DMSO-d6  
HSQC

YPC-H-59-gHSQC  
CNU VNMR5 600MHz

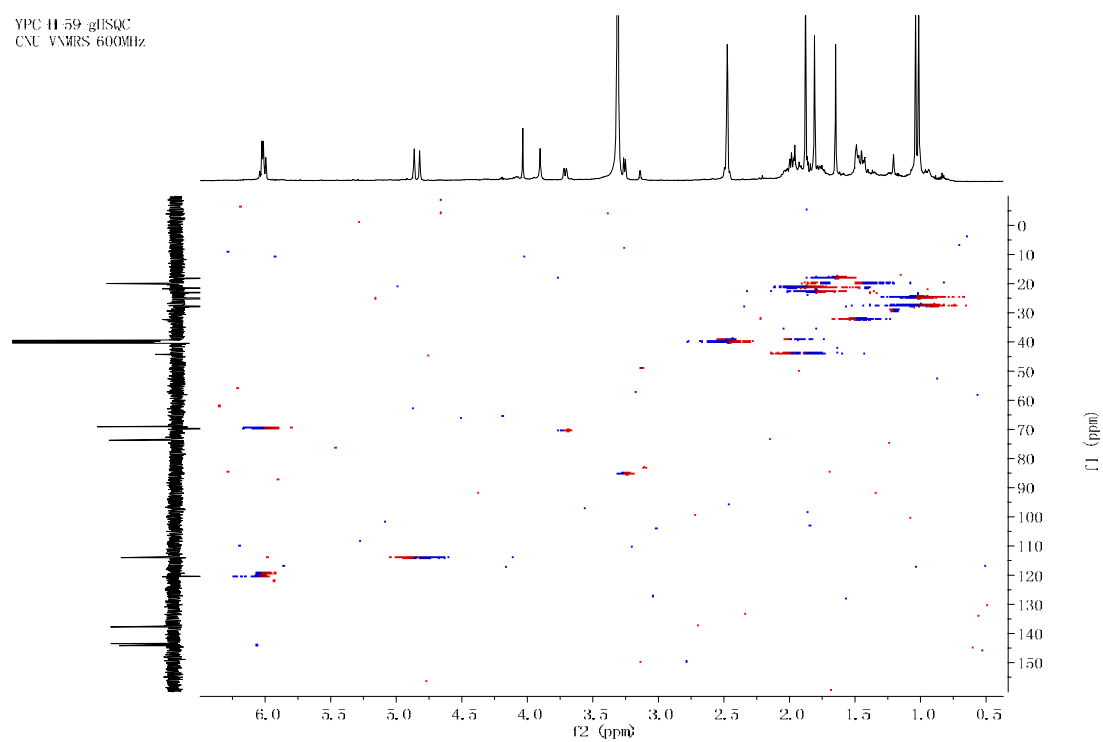

Figure S43 HSQC spectrum of compound **6**

CNU VNMR5 600MHz  
ypc-H-59, DMSO-d6  
HMBC

YPC-H-59-gHMBC  
CNU VNMR5 600MHz

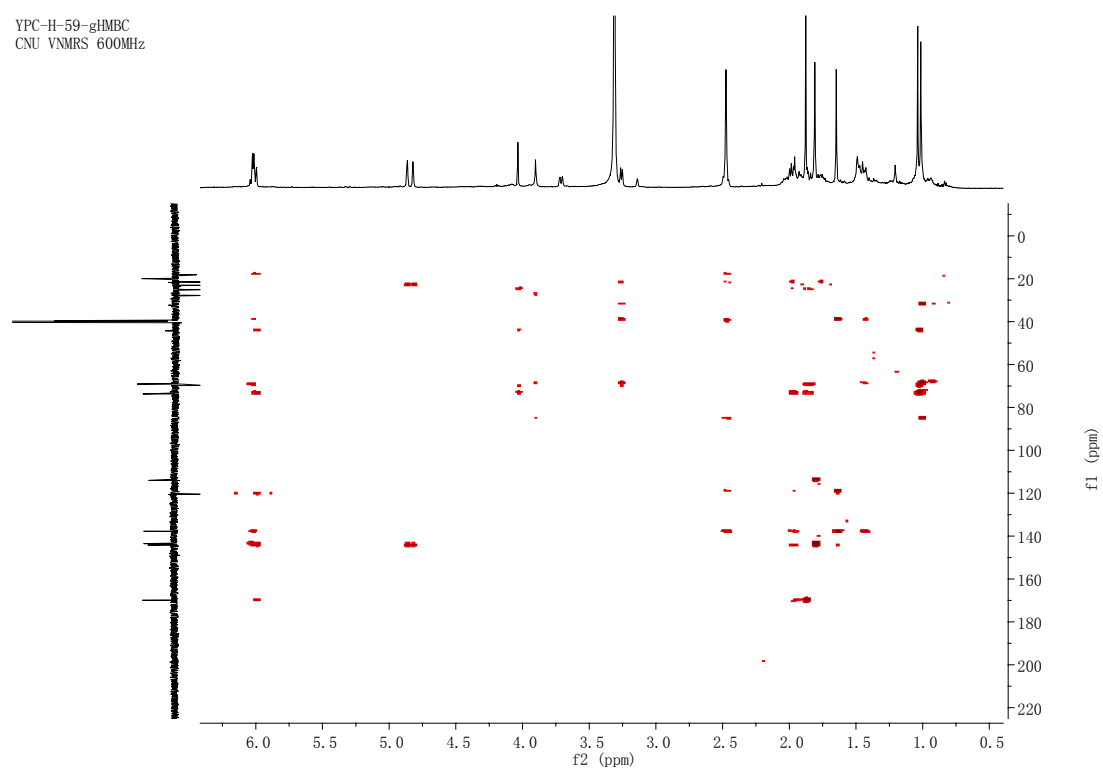

Figure S44 HMBC spectrum of compound **6**

CNU VNMRS 600MHz  
ypc-H-59, DMSO-d6  
COSY

YPC H 59 gCOSY  
CNU VNMRS 600MHz

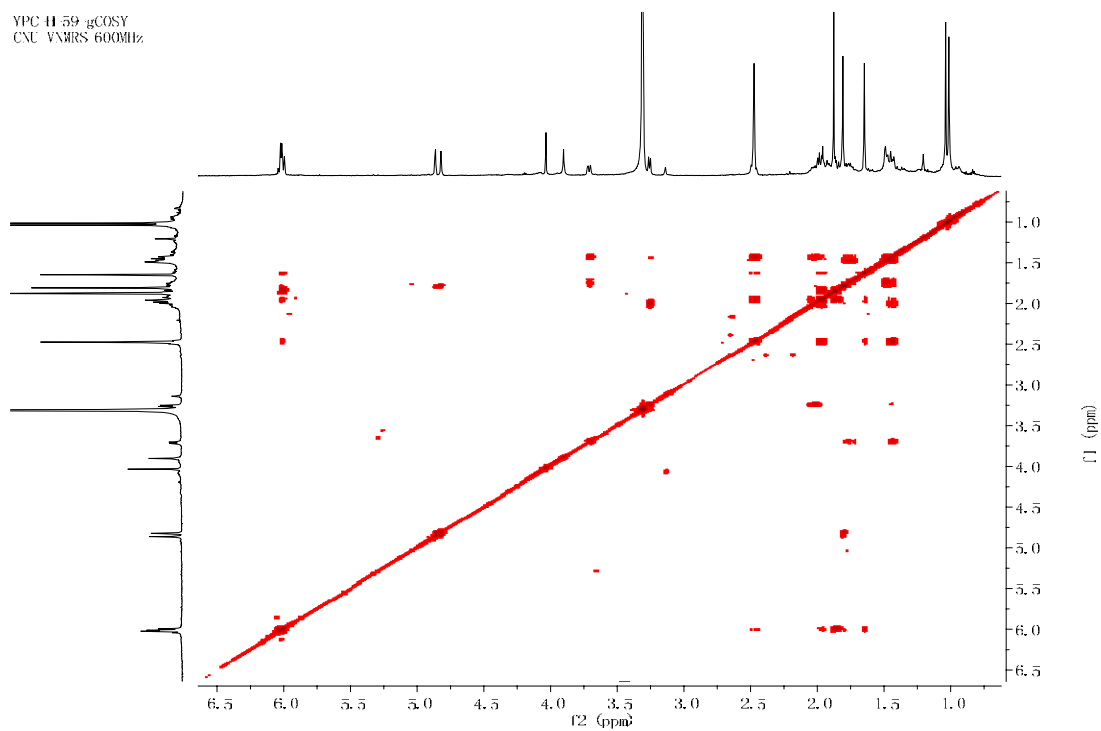

Figure S45 COSY spectrum of compound **6**

CNU VNMRS 600MHz  
ypc-H-59, DMSO-d6  
NOESY

YPC H 59 NOESY  
CNU VNMRS 600MHz

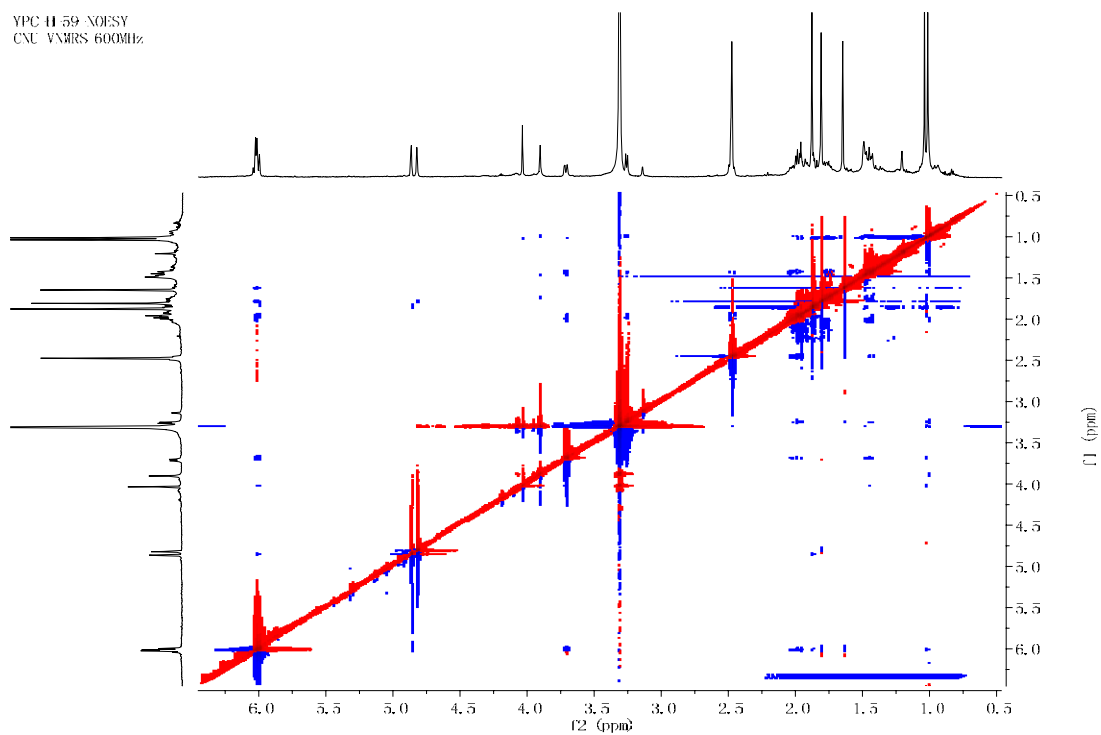

Figure S46 NOESY spectrum of compound **6**



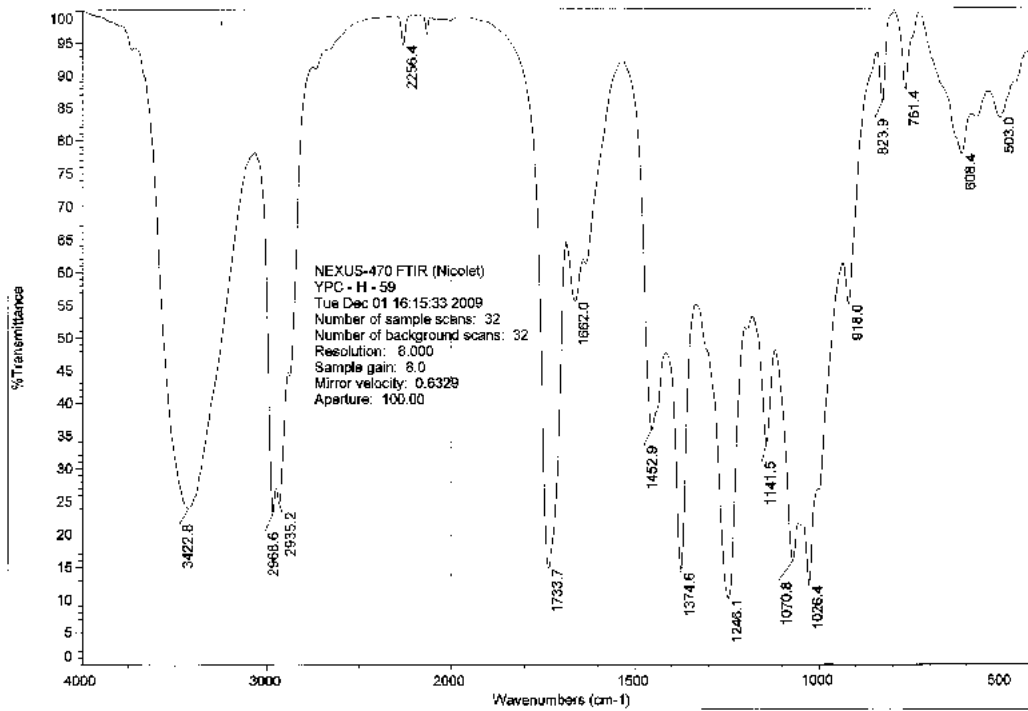

Figure S47 IR spectrum of compound 6

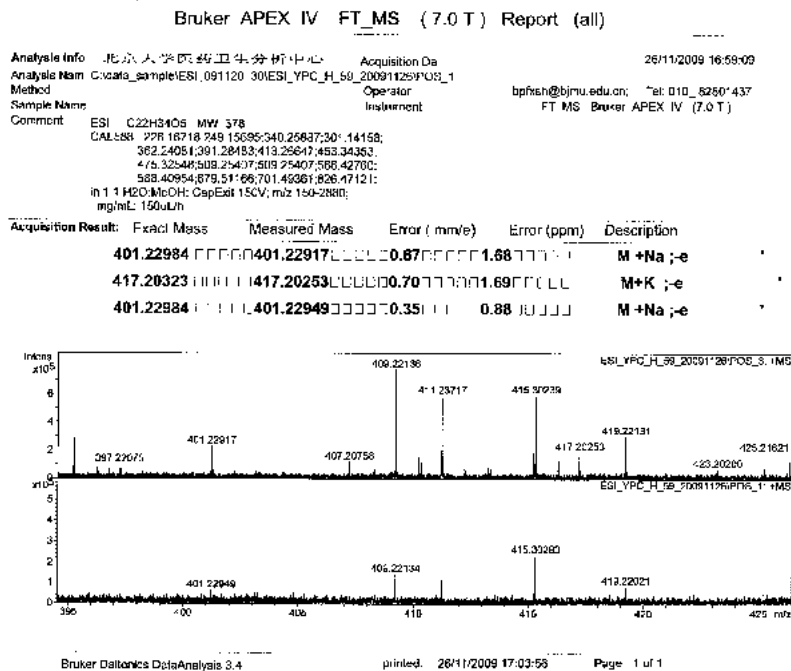

Figure S48 HRESIMS spectrum of compound 6
